# Supplementary material for: Higher Loading of Gold Nanoparticles in PAD Mesenchymal-like Stromal Cells Leads to a Decreased Exocytosis
Source: Cells. 2022 Jul 28;11(15):2323. doi: 10.3390/cells11152323 (PMC9367297; doi:10.3390/cells11152323)
Supplement: Supplementary file 1 [file cells-11-02323-s001.zip › cells-1794838 - supplementary-detailed list.xlsx]

## Sheet: Protein Corona
						4 h		24 h		4 h 20 h
		Accession	Peptide count	Unique peptides	Description	Mean - percentage of all identified proteins (in %, n=2)	Standard Deviation	Mean - percentage of all identified proteins (in %, n=3)	Standard Deviation	Mean - percentage of all identified proteins (in %, n=3)	Standard Deviation
		P02768	31	31	Serum albumin OS=Homo sapiens OX=9606 GN=ALB PE=1 SV=2	16.961	0.943741	1.61005	1.14008	14.1165	4.98856
		P02671	30	30	Fibrinogen alpha chain OS=Homo sapiens OX=9606 GN=FGA PE=1 SV=2	15.8058	2.60416	0.063368	0.0199547	0.0489083	0.00470164
		P02675	28	28	Fibrinogen beta chain OS=Homo sapiens OX=9606 GN=FGB PE=1 SV=2	12.6413	7.65327	0.000758263	0.00131335	0.000111476	9.99314e-05
		P02679	27	27	Fibrinogen gamma chain OS=Homo sapiens OX=9606 GN=FGG PE=1 SV=3	20.6946	3.03854	0.00274495	0.00278658	0.00399671	0.00271798
		P02647	16	16	Apolipoprotein A-I OS=Homo sapiens OX=9606 GN=APOA1 PE=1 SV=1	3.57865	1.46027	0.000314338	0.00054445	0.0021432	0.000818922
		P60709	13	11	Actin_ cytoplasmic 1 OS=Homo sapiens OX=9606 GN=ACTB PE=1 SV=1	0.318296	0.124128	7.1088	0.437562	7.692	2.46744
		P02787	11	11	Serotransferrin OS=Homo sapiens OX=9606 GN=TF PE=1 SV=3	0.278639	0.0258675	0.0122346	0.0113422	0	0
		P06727	9	9	Apolipoprotein A-IV OS=Homo sapiens OX=9606 GN=APOA4 PE=1 SV=3	0.968506	1.1408	26.17	0.4014	7.1108	0.292582
		P02649	9	9	Apolipoprotein E OS=Homo sapiens OX=9606 GN=APOE PE=1 SV=1	0.343042	0.0449646	0	0	0.00168289	0.00103927
		P01876	8	8	Immunoglobulin heavy constant alpha 1 OS=Homo sapiens OX=9606 GN=IGHA1 PE=1 SV=2	0.179754	0.0635871	0	0	0	0
		P04004	7	7	Vitronectin OS=Homo sapiens OX=9606 GN=VTN PE=1 SV=1	0.955263	0.179532	0.0167478	0.012568	0	0
		P01009	6	6	Alpha-1-antitrypsin OS=Homo sapiens OX=9606 GN=SERPINA1 PE=1 SV=3	0.203536	0.0434759	0.0770602	0.0632151	0.0521672	0.00445388
		P62805	6	6	Histone H4 OS=Homo sapiens OX=9606 GN=H4C1 PE=1 SV=2	0.265741	0.0849514	4.68266	0.200023	11.7038	0.362113
		P01834	6	6	Immunoglobulin kappa constant OS=Homo sapiens OX=9606 GN=IGKC PE=1 SV=2	0.873453	0.262975	0	0	0	0
		P10909	5	5	Clusterin OS=Homo sapiens OX=9606 GN=CLU PE=1 SV=1	0.131549	0.110663	0	0	0	0
		P68431	5	5	Histone H3.1 OS=Homo sapiens OX=9606 GN=H3C1 PE=1 SV=2	1.98101	2.39714	4.60103	0.273415	8.25509	0.165319
		P02655	4	4	Apolipoprotein C-II OS=Homo sapiens OX=9606 GN=APOC2 PE=1 SV=1	0.316445	0.251558	0	0	0	0
		P00738	4	4	Haptoglobin OS=Homo sapiens OX=9606 GN=HP PE=1 SV=1	0.102529	0.124833	0	0	0.0206425	0.0209467
		Q93079	5	4	Histone H2B type 1-H OS=Homo sapiens OX=9606 GN=H2BC9 PE=1 SV=3	0.385312	0.523406	10.6227	0.255395	15.0748	1.68293
		Q14520	4	4	Hyaluronan-binding protein 2 OS=Homo sapiens OX=9606 GN=HABP2 PE=1 SV=1	0.56072	0.0346878	0	0	0	0
		P01857	8	4	Immunoglobulin heavy constant gamma 1 OS=Homo sapiens OX=9606 GN=IGHG1 PE=1 SV=1	1.39634	0.41701	0	0	0	0
		P01024	3	3	Complement C3 OS=Homo sapiens OX=9606 GN=C3 PE=1 SV=2	0.0597174	0.00211372	0	0	0	0
		P04908	3	3	Histone H2A type 1-B/E OS=Homo sapiens OX=9606 GN=H2AC4 PE=1 SV=2	0.398677	0.0596378	12.4331	0.387845	10.7367	0.259638
		P05141	3	2	ADP/ATP translocase 2 OS=Homo sapiens OX=9606 GN=SLC25A5 PE=1 SV=7	0.00288715	0.000728217	0.112769	0.0452629	0.15583	0.0566433
		P01023	2	2	Alpha-2-macroglobulin OS=Homo sapiens OX=9606 GN=A2M PE=1 SV=3	0.0280557	0.00179502	0	0	0	0
		O43150	2	2	Arf-GAP with SH3 domain_ ANK repeat and PH domain-containing protein 2 OS=Homo sapiens OX=9606 GN=ASAP2 PE=1 SV=3	0.179961	0.0469894	0.022662	0.00889312	0.0414121	0.011882
		P25705	2	2	ATP synthase subunit alpha_ mitochondrial OS=Homo sapiens OX=9606 GN=ATP5F1A PE=1 SV=1	0.00145797	0.00206189	0.592317	0.0913151	0.274268	0.0155614
		P16401	3	2	Histone H1.5 OS=Homo sapiens OX=9606 GN=H1-5 PE=1 SV=3	0.00713739	0.00427398	0.0945211	0.0419912	1.15656	0.0905141
		P01861	5	2	Immunoglobulin heavy constant gamma 4 OS=Homo sapiens OX=9606 GN=IGHG4 PE=1 SV=1	0.184536	0.0373476	0	0	0.00152514	0.00177068
		P0DOY2	2	2	Immunoglobulin lambda constant 2 OS=Homo sapiens OX=9606 GN=IGLC2 PE=1 SV=1	0.243225	0.15302	0	0	0	0
		P0CG47	2	2	Polyubiquitin-B OS=Homo sapiens OX=9606 GN=UBB PE=1 SV=1	0.0877523	0.0883154	1.80352	0.42355	3.91492	0.24072
		Q13045	2	2	Protein flightless-1 homolog OS=Homo sapiens OX=9606 GN=FLII PE=1 SV=2	0.263479	0.372615	0	0	0	0
		P61619	2	2	Protein transport protein Sec61 subunit alpha isoform 1 OS=Homo sapiens OX=9606 GN=SEC61A1 PE=1 SV=2	0.0269415	0.00579007	0.253027	0.0190555	0.579893	0.180928
		P0DPH7	2	2	Tubulin alpha-3C chain OS=Homo sapiens OX=9606 GN=TUBA3C PE=1 SV=1	0.00308102	0.00435721	0.489174	0.161902	0.846911	0.331979
		P62249	1	1	40S ribosomal protein S16 OS=Homo sapiens OX=9606 GN=RPS16 PE=1 SV=2	0	0	1.10062	0.0960313	0.702202	0.0486988
		P62851	1	1	40S ribosomal protein S25 OS=Homo sapiens OX=9606 GN=RPS25 PE=1 SV=1	0.021949	0.0290835	0.986697	0.154543	1.24786	0.121012
		P12235	2	1	ADP/ATP translocase 1 OS=Homo sapiens OX=9606 GN=SLC25A4 PE=1 SV=4	0.00855947	0.00241866	0.305251	0.0347737	0.354271	0.0351439
		P02656	1	1	Apolipoprotein C-III OS=Homo sapiens OX=9606 GN=APOC3 PE=1 SV=1	6.9273	0.511862	0	0	0.000821543	0.00142295
		P25098	1	1	Beta-adrenergic receptor kinase 1 OS=Homo sapiens OX=9606 GN=GRK2 PE=1 SV=2	0.00476613	0.00674033	0.00651667	0.0112872	0.000932179	0.00161458
		Q9NYV4	1	1	Cyclin-dependent kinase 12 OS=Homo sapiens OX=9606 GN=CDK12 PE=1 SV=2	2.64644	3.74263	0	0	0	0
		Q07065	1	1	Cytoskeleton-associated protein 4 OS=Homo sapiens OX=9606 GN=CKAP4 PE=1 SV=2	0.00542072	0.00766606	0.245666	0.0511103	0.660813	0.0630984
		P04843	1	1	Dolichyl-diphosphooligosaccharide--protein glycosyltransferase subunit 1 OS=Homo sapiens OX=9606 GN=RPN1 PE=1 SV=1	0	0	0.0538856	0.0359573	0.301633	0.0412632
		Q8WYB5	1	1	Histone acetyltransferase KAT6B OS=Homo sapiens OX=9606 GN=KAT6B PE=1 SV=3	0.161862	0.215157	0	0	0.000322457	0.000558512
		P10412	1	1	Histone H1.4 OS=Homo sapiens OX=9606 GN=H1-4 PE=1 SV=2	0.0242022	0.0112397	0.309335	0.141295	2.01414	0.108167
		P01871	1	1	Immunoglobulin heavy constant mu OS=Homo sapiens OX=9606 GN=IGHM PE=1 SV=4	0.532864	0.753584	0	0	0.00404128	0.00350889
		Q5T7N2	1	1	LINE-1 type transposase domain-containing protein 1 OS=Homo sapiens OX=9606 GN=L1TD1 PE=1 SV=1	0.2973	0.420445	0	0	0.0309383	0.00230933
		P49023	1	1	Paxillin OS=Homo sapiens OX=9606 GN=PXN PE=1 SV=3	4.84723	1.9509	3.20911	0.151599	2.23367	0.289711
		P02545	1	1	Prelamin-A/C OS=Homo sapiens OX=9606 GN=LMNA PE=1 SV=1	0	0	0	0	0.0843861	0.146161
		Q7Z7L7	1	1	Protein zer-1 homolog OS=Homo sapiens OX=9606 GN=ZER1 PE=1 SV=1	2.05071	2.74552	0	0	0.0375055	0.0496215
		P51153	1	1	Ras-related protein Rab-13 OS=Homo sapiens OX=9606 GN=RAB13 PE=1 SV=1	0.000137631	0.000140731	0.125917	0.107658	0.754896	0.0533616
		Q9UHR6	1	1	Zinc finger HIT domain-containing protein 2 OS=Homo sapiens OX=9606 GN=ZNHIT2 PE=1 SV=1	1.41746	0.248977	22.8874	0.652488	9.78099	0.405492
		P21506	1	1	Zinc finger protein 10 OS=Homo sapiens OX=9606 GN=ZNF10 PE=1 SV=3	0.625385	0.0999421	0	0	0	0

## Sheet: Lysate
						Lysate
		Accession	Peptide count	Unique peptides	Description	Mean - percentage of all identified proteins (in %, n=3)	Standard Deviation
		P21333	80	72	Filamin-A OS=Homo sapiens OX=9606 GN=FLNA PE=1 SV=4	0.556466	0.0734675
		Q15149	77	65	Plectin OS=Homo sapiens OX=9606 GN=PLEC PE=1 SV=3	0.232426	0.00901661
		P35579	86	62	Myosin-9 OS=Homo sapiens OX=9606 GN=MYH9 PE=1 SV=4	0.857394	0.191061
		Q14315	57	43	Filamin-C OS=Homo sapiens OX=9606 GN=FLNC PE=1 SV=3	0.157717	0.00420958
		Q9Y490	43	33	Talin-1 OS=Homo sapiens OX=9606 GN=TLN1 PE=1 SV=3	0.099666	0.00215673
		O75369	44	32	Filamin-B OS=Homo sapiens OX=9606 GN=FLNB PE=1 SV=2	0.0979503	0.0132785
		P18206	31	29	Vinculin OS=Homo sapiens OX=9606 GN=VCL PE=1 SV=4	1.06645	0.0196405
		P02545	30	28	Prelamin-A/C OS=Homo sapiens OX=9606 GN=LMNA PE=1 SV=1	0.335345	0.0207248
		P08670	40	28	Vimentin OS=Homo sapiens OX=9606 GN=VIM PE=1 SV=4	3.1399	0.0261999
		P08133	29	26	Annexin A6 OS=Homo sapiens OX=9606 GN=ANXA6 PE=1 SV=3	0.276522	0.00353651
		Q14204	36	25	Cytoplasmic dynein 1 heavy chain 1 OS=Homo sapiens OX=9606 GN=DYNC1H1 PE=1 SV=5	0.136185	0.0111253
		P11021	29	25	Endoplasmic reticulum chaperone BiP OS=Homo sapiens OX=9606 GN=HSPA5 PE=1 SV=2	0.736259	0.0373723
		P14618	28	24	Pyruvate kinase PKM OS=Homo sapiens OX=9606 GN=PKM PE=1 SV=4	1.61433	0.0392367
		P07355	24	22	Annexin A2 OS=Homo sapiens OX=9606 GN=ANXA2 PE=1 SV=2	1.11421	0.0652064
		P12111	26	22	Collagen alpha-3(VI) chain OS=Homo sapiens OX=9606 GN=COL6A3 PE=1 SV=5	0.12548	0.00574371
		P13639	25	22	Elongation factor 2 OS=Homo sapiens OX=9606 GN=EEF2 PE=1 SV=4	0.512357	0.0158596
		P49327	22	21	Fatty acid synthase OS=Homo sapiens OX=9606 GN=FASN PE=1 SV=3	0.323033	0.0394945
		P55072	21	21	Transitional endoplasmic reticulum ATPase OS=Homo sapiens OX=9606 GN=VCP PE=1 SV=4	0.215298	0.00777022
		P10809	20	20	60 kDa heat shock protein_ mitochondrial OS=Homo sapiens OX=9606 GN=HSPD1 PE=1 SV=2	0.203993	0.0105462
		Q07065	23	20	Cytoskeleton-associated protein 4 OS=Homo sapiens OX=9606 GN=CKAP4 PE=1 SV=2	0.116783	0.00166067
		P21980	21	20	Protein-glutamine gamma-glutamyltransferase 2 OS=Homo sapiens OX=9606 GN=TGM2 PE=1 SV=2	1.20306	0.0647664
		O43707	38	19	Alpha-actinin-4 OS=Homo sapiens OX=9606 GN=ACTN4 PE=1 SV=2	0.347604	0.00756075
		P53396	18	18	ATP-citrate synthase OS=Homo sapiens OX=9606 GN=ACLY PE=1 SV=3	0.14897	0.0146196
		Q05682	18	18	Caldesmon OS=Homo sapiens OX=9606 GN=CALD1 PE=1 SV=3	0.346185	0.00339559
		Q9NZM1	21	18	Myoferlin OS=Homo sapiens OX=9606 GN=MYOF PE=1 SV=1	0.0904143	0.0170398
		P07237	20	18	Protein disulfide-isomerase OS=Homo sapiens OX=9606 GN=P4HB PE=1 SV=3	0.277348	0.0723881
		P26038	22	17	Moesin OS=Homo sapiens OX=9606 GN=MSN PE=1 SV=3	0.426833	0.00364041
		P46940	19	17	Ras GTPase-activating-like protein IQGAP1 OS=Homo sapiens OX=9606 GN=IQGAP1 PE=1 SV=1	0.061168	0.000698063
		P12814	34	16	Alpha-actinin-1 OS=Homo sapiens OX=9606 GN=ACTN1 PE=1 SV=2	0.32709	0.00533362
		P14625	20	16	Endoplasmin OS=Homo sapiens OX=9606 GN=HSP90B1 PE=1 SV=1	0.317447	0.0141743
		P19338	16	16	Nucleolin OS=Homo sapiens OX=9606 GN=NCL PE=1 SV=3	0.162298	0.00542163
		P30101	17	16	Protein disulfide-isomerase A3 OS=Homo sapiens OX=9606 GN=PDIA3 PE=1 SV=4	0.319132	0.0193512
		P13667	17	16	Protein disulfide-isomerase A4 OS=Homo sapiens OX=9606 GN=PDIA4 PE=1 SV=2	0.14543	0.00330774
		P06733	20	15	Alpha-enolase OS=Homo sapiens OX=9606 GN=ENO1 PE=1 SV=2	1.04376	0.0462541
		P08758	16	15	Annexin A5 OS=Homo sapiens OX=9606 GN=ANXA5 PE=1 SV=2	0.784783	0.00829662
		Q00610	25	15	Clathrin heavy chain 1 OS=Homo sapiens OX=9606 GN=CLTC PE=1 SV=5	0.125313	0.00292318
		P02768	15	15	Serum albumin OS=Homo sapiens OX=9606 GN=ALB PE=1 SV=2	0.155733	0.00801906
		Q7KZF4	17	15	Staphylococcal nuclease domain-containing protein 1 OS=Homo sapiens OX=9606 GN=SND1 PE=1 SV=1	0.0796824	0.00262858
		P22314	18	15	Ubiquitin-like modifier-activating enzyme 1 OS=Homo sapiens OX=9606 GN=UBA1 PE=1 SV=3	0.114372	0.0211082
		O75083	16	15	WD repeat-containing protein 1 OS=Homo sapiens OX=9606 GN=WDR1 PE=1 SV=4	0.221726	0.072937
		P04083	16	14	Annexin A1 OS=Homo sapiens OX=9606 GN=ANXA1 PE=1 SV=2	0.499129	0.0166832
		P68104	16	14	Elongation factor 1-alpha 1 OS=Homo sapiens OX=9606 GN=EEF1A1 PE=1 SV=1	1.17412	0.0252702
		P04075	14	14	Fructose-bisphosphate aldolase A OS=Homo sapiens OX=9606 GN=ALDOA PE=1 SV=2	0.718405	0.0284208
		P05556	14	14	Integrin beta-1 OS=Homo sapiens OX=9606 GN=ITGB1 PE=1 SV=2	0.133717	0.0368839
		P30041	15	14	Peroxiredoxin-6 OS=Homo sapiens OX=9606 GN=PRDX6 PE=1 SV=3	0.26739	0.0136589
		P38646	16	14	Stress-70 protein_ mitochondrial OS=Homo sapiens OX=9606 GN=HSPA9 PE=1 SV=2	0.183635	0.00258247
		P60174	14	14	Triosephosphate isomerase OS=Homo sapiens OX=9606 GN=TPI1 PE=1 SV=3	0.625057	0.00326601
		P23396	13	13	40S ribosomal protein S3 OS=Homo sapiens OX=9606 GN=RPS3 PE=1 SV=2	0.193053	0.00949598
		P25705	13	13	ATP synthase subunit alpha_ mitochondrial OS=Homo sapiens OX=9606 GN=ATP5F1A PE=1 SV=1	0.167312	0.00512351
		P02452	14	13	Collagen alpha-1(I) chain OS=Homo sapiens OX=9606 GN=COL1A1 PE=1 SV=5	0.0945549	0.00275248
		P04843	13	13	Dolichyl-diphosphooligosaccharide--protein glycosyltransferase subunit 1 OS=Homo sapiens OX=9606 GN=RPN1 PE=1 SV=1	0.186853	0.00444138
		Q14764	13	13	Major vault protein OS=Homo sapiens OX=9606 GN=MVP PE=1 SV=4	0.0763075	0.004263
		P35580	25	13	Myosin-10 OS=Homo sapiens OX=9606 GN=MYH10 PE=1 SV=3	0.0382578	0.0119122
		P35232	14	13	Prohibitin OS=Homo sapiens OX=9606 GN=PHB PE=1 SV=1	0.0600928	0.0129058
		P50991	17	13	T-complex protein 1 subunit delta OS=Homo sapiens OX=9606 GN=CCT4 PE=1 SV=4	0.0830355	0.00596242
		O00159	14	13	Unconventional myosin-Ic OS=Homo sapiens OX=9606 GN=MYO1C PE=1 SV=4	0.164108	0.00434186
		P15311	21	12	Ezrin OS=Homo sapiens OX=9606 GN=EZR PE=1 SV=4	0.123095	0.00494227
		P07900	25	12	Heat shock protein HSP 90-alpha OS=Homo sapiens OX=9606 GN=HSP90AA1 PE=1 SV=5	0.257773	0.00434648
		P00338	15	12	L-lactate dehydrogenase A chain OS=Homo sapiens OX=9606 GN=LDHA PE=1 SV=2	0.564067	0.00754937
		Q8WX93	12	12	Palladin OS=Homo sapiens OX=9606 GN=PALLD PE=1 SV=3	0.147629	0.00839221
		Q8NBS9	13	12	Thioredoxin domain-containing protein 5 OS=Homo sapiens OX=9606 GN=TXNDC5 PE=1 SV=2	0.130729	0.00748412
		P18124	12	11	60S ribosomal protein L7 OS=Homo sapiens OX=9606 GN=RPL7 PE=1 SV=1	0.180887	0.0152524
		Q9ULV4	11	11	Coronin-1C OS=Homo sapiens OX=9606 GN=CORO1C PE=1 SV=1	0.124142	0.0013862
		P06396	11	11	Gelsolin OS=Homo sapiens OX=9606 GN=GSN PE=1 SV=1	0.335239	0.166118
		P11142	24	11	Heat shock cognate 71 kDa protein OS=Homo sapiens OX=9606 GN=HSPA8 PE=1 SV=1	0.553839	0.00716423
		Q14974	12	11	Importin subunit beta-1 OS=Homo sapiens OX=9606 GN=KPNB1 PE=1 SV=2	0.138084	0.082384
		P07195	14	11	L-lactate dehydrogenase B chain OS=Homo sapiens OX=9606 GN=LDHB PE=1 SV=2	0.216853	0.0147362
		P40926	13	11	Malate dehydrogenase_ mitochondrial OS=Homo sapiens OX=9606 GN=MDH2 PE=1 SV=3	0.15877	0.00345726
		Q14697	11	11	Neutral alpha-glucosidase AB OS=Homo sapiens OX=9606 GN=GANAB PE=1 SV=3	0.111105	0.0263941
		P62937	14	11	Peptidyl-prolyl cis-trans isomerase A OS=Homo sapiens OX=9606 GN=PPIA PE=1 SV=2	0.977981	0.025341
		P00558	14	11	Phosphoglycerate kinase 1 OS=Homo sapiens OX=9606 GN=PGK1 PE=1 SV=3	0.442607	0.0140218
		P13489	11	11	Ribonuclease inhibitor OS=Homo sapiens OX=9606 GN=RNH1 PE=1 SV=2	0.0701918	0.00227353
		P50990	13	11	T-complex protein 1 subunit theta OS=Homo sapiens OX=9606 GN=CCT8 PE=1 SV=4	0.154034	0.0110702
		Q00341	13	11	Vigilin OS=Homo sapiens OX=9606 GN=HDLBP PE=1 SV=2	0.0513775	0.00307434
		P27797	10	10	Calreticulin OS=Homo sapiens OX=9606 GN=CALR PE=1 SV=1	0.557239	0.0118193
		P48444	10	10	Coatomer subunit delta OS=Homo sapiens OX=9606 GN=ARCN1 PE=1 SV=1	0.526432	0.0137211
		P08123	11	10	Collagen alpha-2(I) chain OS=Homo sapiens OX=9606 GN=COL1A2 PE=1 SV=7	0.257588	0.0334023
		P26641	12	10	Elongation factor 1-gamma OS=Homo sapiens OX=9606 GN=EEF1G PE=1 SV=3	0.15125	0.00986761
		Q14152	11	10	Eukaryotic translation initiation factor 3 subunit A OS=Homo sapiens OX=9606 GN=EIF3A PE=1 SV=1	0.0757416	0.000887934
		P02751	12	10	Fibronectin OS=Homo sapiens OX=9606 GN=FN1 PE=1 SV=5	0.022694	0.00248998
		P04406	11	10	Glyceraldehyde-3-phosphate dehydrogenase OS=Homo sapiens OX=9606 GN=GAPDH PE=1 SV=3	1.38573	0.0359003
		P06748	10	10	Nucleophosmin OS=Homo sapiens OX=9606 GN=NPM1 PE=1 SV=2	0.285614	0.0125015
		Q15084	11	10	Protein disulfide-isomerase A6 OS=Homo sapiens OX=9606 GN=PDIA6 PE=1 SV=1	0.140406	0.00710028
		P50395	15	10	Rab GDP dissociation inhibitor beta OS=Homo sapiens OX=9606 GN=GDI2 PE=1 SV=2	0.128947	0.00234973
		P17987	10	10	T-complex protein 1 subunit alpha OS=Homo sapiens OX=9606 GN=TCP1 PE=1 SV=1	0.119556	0.0128399
		P78371	10	10	T-complex protein 1 subunit beta OS=Homo sapiens OX=9606 GN=CCT2 PE=1 SV=4	0.190982	0.0596836
		P40227	10	10	T-complex protein 1 subunit zeta OS=Homo sapiens OX=9606 GN=CCT6A PE=1 SV=3	0.0604153	0.0028931
		Q01518	10	9	Adenylyl cyclase-associated protein 1 OS=Homo sapiens OX=9606 GN=CAP1 PE=1 SV=5	0.226029	0.00463385
		P06576	10	9	ATP synthase subunit beta_ mitochondrial OS=Homo sapiens OX=9606 GN=ATP5F1B PE=1 SV=3	0.0644302	0.00911191
		O00299	10	9	Chloride intracellular channel protein 1 OS=Homo sapiens OX=9606 GN=CLIC1 PE=1 SV=4	0.194645	0.00675352
		P53621	10	9	Coatomer subunit alpha OS=Homo sapiens OX=9606 GN=COPA PE=1 SV=2	0.10454	0.00341372
		Q16658	11	9	Fascin OS=Homo sapiens OX=9606 GN=FSCN1 PE=1 SV=3	0.104969	0.0295457
		P11413	9	9	Glucose-6-phosphate 1-dehydrogenase OS=Homo sapiens OX=9606 GN=G6PD PE=1 SV=4	0.0767008	0.00712741
		P41250	9	9	Glycine--tRNA ligase OS=Homo sapiens OX=9606 GN=GARS1 PE=1 SV=3	0.0885123	0.0007722
		P08238	28	9	Heat shock protein HSP 90-beta OS=Homo sapiens OX=9606 GN=HSP90AB1 PE=1 SV=4	0.414491	0.00279374
		P19367	11	9	Hexokinase-1 OS=Homo sapiens OX=9606 GN=HK1 PE=1 SV=3	0.0395142	0.00258961
		P23284	12	9	Peptidyl-prolyl cis-trans isomerase B OS=Homo sapiens OX=9606 GN=PPIB PE=1 SV=2	0.404484	0.0144218
		P13797	13	9	Plastin-3 OS=Homo sapiens OX=9606 GN=PLS3 PE=1 SV=4	0.141888	0.0111047
		Q9P2E9	10	9	Ribosome-binding protein 1 OS=Homo sapiens OX=9606 GN=RRBP1 PE=1 SV=5	0.0902876	0.0199483
		P34897	11	9	Serine hydroxymethyltransferase_ mitochondrial OS=Homo sapiens OX=9606 GN=SHMT2 PE=1 SV=3	0.0475959	0.000846176
		P50454	9	9	Serpin H1 OS=Homo sapiens OX=9606 GN=SERPINH1 PE=1 SV=2	0.236276	0.0249637
		P48643	13	9	T-complex protein 1 subunit epsilon OS=Homo sapiens OX=9606 GN=CCT5 PE=1 SV=1	0.128858	0.0244257
		P49368	9	9	T-complex protein 1 subunit gamma OS=Homo sapiens OX=9606 GN=CCT3 PE=1 SV=4	0.0922748	0.00407831
		P07996	10	9	Thrombospondin-1 OS=Homo sapiens OX=9606 GN=THBS1 PE=1 SV=2	0.0547083	0.00178096
		P29401	10	9	Transketolase OS=Homo sapiens OX=9606 GN=TKT PE=1 SV=3	0.2295	0.0428193
		P62701	10	8	40S ribosomal protein S4_ X isoform OS=Homo sapiens OX=9606 GN=RPS4X PE=1 SV=2	0.0639666	0.00898605
		Q02878	8	8	60S ribosomal protein L6 OS=Homo sapiens OX=9606 GN=RPL6 PE=1 SV=3	0.177652	0.00482725
		P61158	11	8	Actin-related protein 3 OS=Homo sapiens OX=9606 GN=ACTR3 PE=1 SV=3	0.124789	0.00444467
		P11586	10	8	C-1-tetrahydrofolate synthase_ cytoplasmic OS=Homo sapiens OX=9606 GN=MTHFD1 PE=1 SV=3	0.0223518	0.00441514
		O43175	8	8	D-3-phosphoglycerate dehydrogenase OS=Homo sapiens OX=9606 GN=PHGDH PE=1 SV=4	0.0633424	0.000771077
		P06744	8	8	Glucose-6-phosphate isomerase OS=Homo sapiens OX=9606 GN=GPI PE=1 SV=4	0.103212	0.00785283
		P34932	11	8	Heat shock 70 kDa protein 4 OS=Homo sapiens OX=9606 GN=HSPA4 PE=1 SV=4	0.0415432	0.0015846
		P22626	9	8	Heterogeneous nuclear ribonucleoproteins A2/B1 OS=Homo sapiens OX=9606 GN=HNRNPA2B1 PE=1 SV=2	0.1046	0.0365893
		P62805	9	8	Histone H4 OS=Homo sapiens OX=9606 GN=H4C1 PE=1 SV=2	2.23943	0.132426
		Q9Y617	8	8	Phosphoserine aminotransferase OS=Homo sapiens OX=9606 GN=PSAT1 PE=1 SV=2	0.0482957	8.33843e-05
		P51149	9	8	Ras-related protein Rab-7a OS=Homo sapiens OX=9606 GN=RAB7A PE=1 SV=1	0.0773982	0.00287126
		Q15019	8	8	Septin-2 OS=Homo sapiens OX=9606 GN=SEPTIN2 PE=1 SV=1	0.0477589	0.00225273
		P63104	11	7	14-3-3 protein zeta/delta OS=Homo sapiens OX=9606 GN=YWHAZ PE=1 SV=1	0.17509	0.00512467
		P62244	7	7	40S ribosomal protein S15a OS=Homo sapiens OX=9606 GN=RPS15A PE=1 SV=2	0.204056	0.00241603
		P50914	7	7	60S ribosomal protein L14 OS=Homo sapiens OX=9606 GN=RPL14 PE=1 SV=4	0.208928	0.015528
		P36578	7	7	60S ribosomal protein L4 OS=Homo sapiens OX=9606 GN=RPL4 PE=1 SV=5	0.0964977	0.00289913
		P62736	22	7	Actin_ aortic smooth muscle OS=Homo sapiens OX=9606 GN=ACTA2 PE=1 SV=1	0.400784	0.0106351
		P63261	23	7	Actin_ cytoplasmic 2 OS=Homo sapiens OX=9606 GN=ACTG1 PE=1 SV=1	6.57929	0.183704
		P49588	9	7	Alanine--tRNA ligase_ cytoplasmic OS=Homo sapiens OX=9606 GN=AARS1 PE=1 SV=2	0.0153681	0.000428728
		Q12797	7	7	Aspartyl/asparaginyl beta-hydroxylase OS=Homo sapiens OX=9606 GN=ASPH PE=1 SV=3	0.0224703	0.00541139
		P09382	7	7	Galectin-1 OS=Homo sapiens OX=9606 GN=LGALS1 PE=1 SV=2	1.32108	0.0834372
		P47897	8	7	Glutamine--tRNA ligase OS=Homo sapiens OX=9606 GN=QARS1 PE=1 SV=1	0.0589952	0.00787202
		Q12906	8	7	Interleukin enhancer-binding factor 3 OS=Homo sapiens OX=9606 GN=ILF3 PE=1 SV=3	0.066553	0.00249675
		P40925	8	7	Malate dehydrogenase_ cytoplasmic OS=Homo sapiens OX=9606 GN=MDH1 PE=1 SV=4	0.0860932	0.00128283
		P35749	17	7	Myosin-11 OS=Homo sapiens OX=9606 GN=MYH11 PE=1 SV=3	0.104135	0.00998419
		P04181	7	7	Ornithine aminotransferase_ mitochondrial OS=Homo sapiens OX=9606 GN=OAT PE=1 SV=1	0.0310896	0.00354668
		P16615	11	7	Sarcoplasmic/endoplasmic reticulum calcium ATPase 2 OS=Homo sapiens OX=9606 GN=ATP2A2 PE=1 SV=1	0.0678176	0.00830825
		P26639	11	7	Threonine--tRNA ligase 1_ cytoplasmic OS=Homo sapiens OX=9606 GN=TARS1 PE=1 SV=3	0.158042	0.00934855
		P67936	19	7	Tropomyosin alpha-4 chain OS=Homo sapiens OX=9606 GN=TPM4 PE=1 SV=3	0.47854	0.00772953
		P15880	6	6	40S ribosomal protein S2 OS=Homo sapiens OX=9606 GN=RPS2 PE=1 SV=2	0.138945	0.0131811
		P62241	8	6	40S ribosomal protein S8 OS=Homo sapiens OX=9606 GN=RPS8 PE=1 SV=2	0.176372	0.00359606
		P46781	6	6	40S ribosomal protein S9 OS=Homo sapiens OX=9606 GN=RPS9 PE=1 SV=3	0.168539	0.00967452
		P05388	6	6	60S acidic ribosomal protein P0 OS=Homo sapiens OX=9606 GN=RPLP0 PE=1 SV=1	0.211099	0.00873526
		P39023	8	6	60S ribosomal protein L3 OS=Homo sapiens OX=9606 GN=RPL3 PE=1 SV=2	0.0909528	0.00801332
		P62424	7	6	60S ribosomal protein L7a OS=Homo sapiens OX=9606 GN=RPL7A PE=1 SV=2	0.146278	0.00919382
		P61160	7	6	Actin-related protein 2 OS=Homo sapiens OX=9606 GN=ACTR2 PE=1 SV=1	0.0926906	0.00814728
		O15144	6	6	Actin-related protein 2/3 complex subunit 2 OS=Homo sapiens OX=9606 GN=ARPC2 PE=1 SV=1	0.188351	0.00238988
		Q01813	6	6	ATP-dependent 6-phosphofructokinase_ platelet type OS=Homo sapiens OX=9606 GN=PFKP PE=1 SV=2	0.0438095	0.00705337
		Q9Y696	7	6	Chloride intracellular channel protein 4 OS=Homo sapiens OX=9606 GN=CLIC4 PE=1 SV=4	0.088807	0.00334124
		P23528	8	6	Cofilin-1 OS=Homo sapiens OX=9606 GN=CFL1 PE=1 SV=3	0.8033	0.00874464
		P12277	7	6	Creatine kinase B-type OS=Homo sapiens OX=9606 GN=CKB PE=1 SV=1	0.0419083	0.0035834
		Q9NZN4	6	6	EH domain-containing protein 2 OS=Homo sapiens OX=9606 GN=EHD2 PE=1 SV=2	0.0259085	0.00203667
		P24534	6	6	Elongation factor 1-beta OS=Homo sapiens OX=9606 GN=EEF1B2 PE=1 SV=3	0.111833	0.00703261
		Q96AC1	6	6	Fermitin family homolog 2 OS=Homo sapiens OX=9606 GN=FERMT2 PE=1 SV=1	0.050187	0.00139855
		P04792	7	6	Heat shock protein beta-1 OS=Homo sapiens OX=9606 GN=HSPB1 PE=1 SV=2	0.706079	0.0499454
		P17301	8	6	Integrin alpha-2 OS=Homo sapiens OX=9606 GN=ITGA2 PE=1 SV=1	0.0310513	0.00142752
		Q12905	6	6	Interleukin enhancer-binding factor 2 OS=Homo sapiens OX=9606 GN=ILF2 PE=1 SV=2	0.0929891	0.00273348
		Q00325	6	6	Phosphate carrier protein_ mitochondrial OS=Homo sapiens OX=9606 GN=SLC25A3 PE=1 SV=2	0.0721605	0.00533369
		P30086	6	6	Phosphatidylethanolamine-binding protein 1 OS=Homo sapiens OX=9606 GN=PEBP1 PE=1 SV=3	0.0663701	0.00259719
		P18669	6	6	Phosphoglycerate mutase 1 OS=Homo sapiens OX=9606 GN=PGAM1 PE=1 SV=2	0.212813	0.00883601
		P11940	13	6	Polyadenylate-binding protein 1 OS=Homo sapiens OX=9606 GN=PABPC1 PE=1 SV=2	0.0857424	0.00865801
		P0CG47	7	6	Polyubiquitin-B OS=Homo sapiens OX=9606 GN=UBB PE=1 SV=1	0.940559	0.0316905
		O00469	6	6	Procollagen-lysine_2-oxoglutarate 5-dioxygenase 2 OS=Homo sapiens OX=9606 GN=PLOD2 PE=1 SV=2	0.0241315	0.00109982
		P07737	6	6	Profilin-1 OS=Homo sapiens OX=9606 GN=PFN1 PE=1 SV=2	1.37239	0.0474518
		Q9UQ80	6	6	Proliferation-associated protein 2G4 OS=Homo sapiens OX=9606 GN=PA2G4 PE=1 SV=3	0.0809446	0.019021
		P63244	10	6	Receptor of activated protein C kinase 1 OS=Homo sapiens OX=9606 GN=RACK1 PE=1 SV=3	0.26969	0.0117446
		P00352	6	6	Retinal dehydrogenase 1 OS=Homo sapiens OX=9606 GN=ALDH1A1 PE=1 SV=2	0.0839779	0.0130074
		Q9UHD8	6	6	Septin-9 OS=Homo sapiens OX=9606 GN=SEPTIN9 PE=1 SV=2	0.0275693	0.000799019
		Q15393	9	6	Splicing factor 3B subunit 3 OS=Homo sapiens OX=9606 GN=SF3B3 PE=1 SV=4	0.305498	0.0030223
		P31948	7	6	Stress-induced-phosphoprotein 1 OS=Homo sapiens OX=9606 GN=STIP1 PE=1 SV=1	0.0871312	0.00774671
		Q99832	7	6	T-complex protein 1 subunit eta OS=Homo sapiens OX=9606 GN=CCT7 PE=1 SV=2	0.0631413	0.0148892
		P37837	7	6	Transaldolase OS=Homo sapiens OX=9606 GN=TALDO1 PE=1 SV=2	0.139061	0.00728788
		P54577	6	6	Tyrosine--tRNA ligase_ cytoplasmic OS=Homo sapiens OX=9606 GN=YARS1 PE=1 SV=4	0.040601	0.00257546
		P09936	7	6	Ubiquitin carboxyl-terminal hydrolase isozyme L1 OS=Homo sapiens OX=9606 GN=UCHL1 PE=1 SV=2	0.252617	0.0217561
		P61604	5	5	10 kDa heat shock protein_ mitochondrial OS=Homo sapiens OX=9606 GN=HSPE1 PE=1 SV=2	0.127581	0.00817375
		O00231	5	5	26S proteasome non-ATPase regulatory subunit 11 OS=Homo sapiens OX=9606 GN=PSMD11 PE=1 SV=3	0.0424029	0.00472809
		Q13200	8	5	26S proteasome non-ATPase regulatory subunit 2 OS=Homo sapiens OX=9606 GN=PSMD2 PE=1 SV=3	0.0210255	0.00196996
		P62195	5	5	26S proteasome regulatory subunit 8 OS=Homo sapiens OX=9606 GN=PSMC5 PE=1 SV=1	0.326521	0.00927947
		P62081	5	5	40S ribosomal protein S7 OS=Homo sapiens OX=9606 GN=RPS7 PE=1 SV=1	0.117618	0.00379561
		P52209	5	5	6-phosphogluconate dehydrogenase_ decarboxylating OS=Homo sapiens OX=9606 GN=PGD PE=1 SV=3	0.0461161	0.00564743
		P30050	5	5	60S ribosomal protein L12 OS=Homo sapiens OX=9606 GN=RPL12 PE=1 SV=1	0.13598	0.00535053
		P46777	5	5	60S ribosomal protein L5 OS=Homo sapiens OX=9606 GN=RPL5 PE=1 SV=3	0.129348	0.00765529
		P32969	5	5	60S ribosomal protein L9 OS=Homo sapiens OX=9606 GN=RPL9 PE=1 SV=1	0.12715	0.0207213
		P23526	5	5	Adenosylhomocysteinase OS=Homo sapiens OX=9606 GN=AHCY PE=1 SV=4	0.0299434	0.00211394
		P15121	5	5	Aldo-keto reductase family 1 member B1 OS=Homo sapiens OX=9606 GN=AKR1B1 PE=1 SV=3	0.061664	0.00624567
		P00505	5	5	Aspartate aminotransferase_ mitochondrial OS=Homo sapiens OX=9606 GN=GOT2 PE=1 SV=3	0.241712	0.00218745
		Q08211	5	5	ATP-dependent RNA helicase A OS=Homo sapiens OX=9606 GN=DHX9 PE=1 SV=4	0.0996157	0.0046762
		P31939	6	5	Bifunctional purine biosynthesis protein PURH OS=Homo sapiens OX=9606 GN=ATIC PE=1 SV=3	0.0548285	0.00122332
		P80723	5	5	Brain acid soluble protein 1 OS=Homo sapiens OX=9606 GN=BASP1 PE=1 SV=2	0.00946989	0.00144231
		P27824	6	5	Calnexin OS=Homo sapiens OX=9606 GN=CANX PE=1 SV=2	0.122291	0.00146402
		P07339	7	5	Cathepsin D OS=Homo sapiens OX=9606 GN=CTSD PE=1 SV=1	0.0562224	0.0010127
		P16070	6	5	CD44 antigen OS=Homo sapiens OX=9606 GN=CD44 PE=1 SV=3	0.243224	0.00659338
		Q14019	6	5	Coactosin-like protein OS=Homo sapiens OX=9606 GN=COTL1 PE=1 SV=3	0.0800757	0.00146793
		P35606	6	5	Coatomer subunit beta' OS=Homo sapiens OX=9606 GN=COPB2 PE=1 SV=2	0.041407	0.00202134
		Q9Y678	6	5	Coatomer subunit gamma-1 OS=Homo sapiens OX=9606 GN=COPG1 PE=1 SV=1	0.0426236	0.00198805
		A6NC98	5	5	Coiled-coil domain-containing protein 88B OS=Homo sapiens OX=9606 GN=CCDC88B PE=1 SV=1	0.0267793	0.00102612
		P60981	6	5	Destrin OS=Homo sapiens OX=9606 GN=DSTN PE=1 SV=3	0.101311	0.00197595
		Q14195	9	5	Dihydropyrimidinase-related protein 3 OS=Homo sapiens OX=9606 GN=DPYSL3 PE=1 SV=1	0.0645131	0.00365399
		P39656	6	5	Dolichyl-diphosphooligosaccharide--protein glycosyltransferase 48 kDa subunit OS=Homo sapiens OX=9606 GN=DDOST PE=1 SV=4	0.0798677	0.0047787
		P04844	5	5	Dolichyl-diphosphooligosaccharide--protein glycosyltransferase subunit 2 OS=Homo sapiens OX=9606 GN=RPN2 PE=1 SV=3	0.0824637	0.000401876
		P46977	5	5	Dolichyl-diphosphooligosaccharide--protein glycosyltransferase subunit STT3A OS=Homo sapiens OX=9606 GN=STT3A PE=1 SV=2	0.0374688	0.00748191
		P38919	6	5	Eukaryotic initiation factor 4A-III OS=Homo sapiens OX=9606 GN=EIF4A3 PE=1 SV=4	0.03456	0.0102135
		P62826	5	5	GTP-binding nuclear protein Ran OS=Homo sapiens OX=9606 GN=RAN PE=1 SV=3	0.14355	0.00867882
		P0DMV8	15	5	Heat shock 70 kDa protein 1A OS=Homo sapiens OX=9606 GN=HSPA1A PE=1 SV=1	0.0521141	0.00465413
		Q92598	7	5	Heat shock protein 105 kDa OS=Homo sapiens OX=9606 GN=HSPH1 PE=1 SV=1	0.0401172	0.00197755
		P09651	6	5	Heterogeneous nuclear ribonucleoprotein A1 OS=Homo sapiens OX=9606 GN=HNRNPA1 PE=1 SV=5	0.20206	0.00501302
		P31943	6	5	Heterogeneous nuclear ribonucleoprotein H OS=Homo sapiens OX=9606 GN=HNRNPH1 PE=1 SV=4	0.106958	0.00649382
		P61978	6	5	Heterogeneous nuclear ribonucleoprotein K OS=Homo sapiens OX=9606 GN=HNRNPK PE=1 SV=1	0.0627594	0.0229712
		O60506	9	5	Heterogeneous nuclear ribonucleoprotein Q OS=Homo sapiens OX=9606 GN=SYNCRIP PE=1 SV=2	0.0835978	0.00548472
		Q00839	5	5	Heterogeneous nuclear ribonucleoprotein U OS=Homo sapiens OX=9606 GN=HNRNPU PE=1 SV=6	0.0327125	0.00184048
		P20700	8	5	Lamin-B1 OS=Homo sapiens OX=9606 GN=LMNB1 PE=1 SV=2	0.042724	0.000501726
		Q03252	7	5	Lamin-B2 OS=Homo sapiens OX=9606 GN=LMNB2 PE=1 SV=4	0.0120733	0.000635505
		P60660	5	5	Myosin light polypeptide 6 OS=Homo sapiens OX=9606 GN=MYL6 PE=1 SV=2	0.215751	0.0134408
		Q99497	6	5	Parkinson disease protein 7 OS=Homo sapiens OX=9606 GN=PARK7 PE=1 SV=2	0.106456	0.00384394
		Q06830	8	5	Peroxiredoxin-1 OS=Homo sapiens OX=9606 GN=PRDX1 PE=1 SV=1	0.423488	0.0144924
		Q92841	10	5	Probable ATP-dependent RNA helicase DDX17 OS=Homo sapiens OX=9606 GN=DDX17 PE=1 SV=2	0.0511182	0.00634289
		Q8WUM4	6	5	Programmed cell death 6-interacting protein OS=Homo sapiens OX=9606 GN=PDCD6IP PE=1 SV=1	0.0557999	0.0036341
		Q99623	6	5	Prohibitin-2 OS=Homo sapiens OX=9606 GN=PHB2 PE=1 SV=2	0.0244269	0.00152843
		Q32P28	6	5	Prolyl 3-hydroxylase 1 OS=Homo sapiens OX=9606 GN=P3H1 PE=1 SV=2	0.0102115	0.000440303
		O15460	5	5	Prolyl 4-hydroxylase subunit alpha-2 OS=Homo sapiens OX=9606 GN=P4HA2 PE=1 SV=1	0.0245178	0.00396293
		Q99873	6	5	Protein arginine N-methyltransferase 1 OS=Homo sapiens OX=9606 GN=PRMT1 PE=1 SV=3	0.0364067	0.00395566
		Q01105	5	5	Protein SET OS=Homo sapiens OX=9606 GN=SET PE=1 SV=3	0.105095	0.00470485
		Q5TZA2	10	5	Rootletin OS=Homo sapiens OX=9606 GN=CROCC PE=1 SV=1	0.106497	0.0419348
		Q07955	6	5	Serine/arginine-rich splicing factor 1 OS=Homo sapiens OX=9606 GN=SRSF1 PE=1 SV=2	0.0774661	0.0114167
		P05023	8	5	Sodium/potassium-transporting ATPase subunit alpha-1 OS=Homo sapiens OX=9606 GN=ATP1A1 PE=1 SV=1	0.0208289	0.00186336
		Q99536	5	5	Synaptic vesicle membrane protein VAT-1 homolog OS=Homo sapiens OX=9606 GN=VAT1 PE=1 SV=2	0.0891468	0.00448927
		Q01995	5	5	Transgelin OS=Homo sapiens OX=9606 GN=TAGLN PE=1 SV=4	0.126222	0.00186402
		O60701	6	5	UDP-glucose 6-dehydrogenase OS=Homo sapiens OX=9606 GN=UGDH PE=1 SV=1	0.0394163	0.00101758
		Q04446	4	4	1_4-alpha-glucan-branching enzyme OS=Homo sapiens OX=9606 GN=GBE1 PE=1 SV=3	0.0286325	0.00486284
		P62258	7	4	14-3-3 protein epsilon OS=Homo sapiens OX=9606 GN=YWHAE PE=1 SV=1	0.0347279	0.000313011
		P62280	4	4	40S ribosomal protein S11 OS=Homo sapiens OX=9606 GN=RPS11 PE=1 SV=3	0.127398	0.00444997
		P62277	4	4	40S ribosomal protein S13 OS=Homo sapiens OX=9606 GN=RPS13 PE=1 SV=2	0.103829	0.00492189
		P62269	4	4	40S ribosomal protein S18 OS=Homo sapiens OX=9606 GN=RPS18 PE=1 SV=3	0.088315	0.000782372
		P08865	4	4	40S ribosomal protein SA OS=Homo sapiens OX=9606 GN=RPSA PE=1 SV=4	0.075207	0.00200869
		P21589	5	4	5'-nucleotidase OS=Homo sapiens OX=9606 GN=NT5E PE=1 SV=1	0.0632456	0.000586992
		P40429	4	4	60S ribosomal protein L13a OS=Homo sapiens OX=9606 GN=RPL13A PE=1 SV=2	0.0332807	0.00104361
		Q07020	4	4	60S ribosomal protein L18 OS=Homo sapiens OX=9606 GN=RPL18 PE=1 SV=2	0.253199	0.00808654
		P35268	4	4	60S ribosomal protein L22 OS=Homo sapiens OX=9606 GN=RPL22 PE=1 SV=2	0.147762	0.000665761
		P62829	4	4	60S ribosomal protein L23 OS=Homo sapiens OX=9606 GN=RPL23 PE=1 SV=1	0.12339	0.00170353
		P61353	4	4	60S ribosomal protein L27 OS=Homo sapiens OX=9606 GN=RPL27 PE=1 SV=2	0.0771212	0.00201089
		P62917	4	4	60S ribosomal protein L8 OS=Homo sapiens OX=9606 GN=RPL8 PE=1 SV=2	0.103743	0.0140964
		Q8IZT6	5	4	Abnormal spindle-like microcephaly-associated protein OS=Homo sapiens OX=9606 GN=ASPM PE=1 SV=2	0.0693078	0.0144241
		O15143	5	4	Actin-related protein 2/3 complex subunit 1B OS=Homo sapiens OX=9606 GN=ARPC1B PE=1 SV=3	0.0718903	0.00778436
		P59998	4	4	Actin-related protein 2/3 complex subunit 4 OS=Homo sapiens OX=9606 GN=ARPC4 PE=1 SV=3	0.0380674	0.00385255
		P30520	4	4	Adenylosuccinate synthetase isozyme 2 OS=Homo sapiens OX=9606 GN=ADSS2 PE=1 SV=3	0.0242725	0.000949055
		P54136	5	4	Arginine--tRNA ligase_ cytoplasmic OS=Homo sapiens OX=9606 GN=RARS1 PE=1 SV=2	0.0108516	0.00174753
		Q92499	4	4	ATP-dependent RNA helicase DDX1 OS=Homo sapiens OX=9606 GN=DDX1 PE=1 SV=2	0.165686	0.00677699
		P17655	4	4	Calpain-2 catalytic subunit OS=Homo sapiens OX=9606 GN=CAPN2 PE=1 SV=6	0.0467292	0.0031425
		O75828	5	4	Carbonyl reductase [NADPH] 3 OS=Homo sapiens OX=9606 GN=CBR3 PE=1 SV=3	0.00842189	0.00547658
		P60953	5	4	Cell division control protein 42 homolog OS=Homo sapiens OX=9606 GN=CDC42 PE=1 SV=2	0.090253	0.0149321
		O75390	4	4	Citrate synthase_ mitochondrial OS=Homo sapiens OX=9606 GN=CS PE=1 SV=2	0.0370476	0.00153983
		Q9Y281	6	4	Cofilin-2 OS=Homo sapiens OX=9606 GN=CFL2 PE=1 SV=1	0.0652207	0.00120348
		P17812	4	4	CTP synthase 1 OS=Homo sapiens OX=9606 GN=CTPS1 PE=1 SV=2	0.0897024	0.00265185
		P30040	4	4	Endoplasmic reticulum resident protein 29 OS=Homo sapiens OX=9606 GN=ERP29 PE=1 SV=4	0.0688761	0.00160935
		Q9BS26	5	4	Endoplasmic reticulum resident protein 44 OS=Homo sapiens OX=9606 GN=ERP44 PE=1 SV=1	0.0224207	0.00238156
		P63241	4	4	Eukaryotic translation initiation factor 5A-1 OS=Homo sapiens OX=9606 GN=EIF5A PE=1 SV=2	0.0810011	0.0292656
		Q9BSJ8	5	4	Extended synaptotagmin-1 OS=Homo sapiens OX=9606 GN=ESYT1 PE=1 SV=1	0.0286752	0.00180745
		P00367	5	4	Glutamate dehydrogenase 1_ mitochondrial OS=Homo sapiens OX=9606 GN=GLUD1 PE=1 SV=2	0.0266828	0.00458313
		P14866	6	4	Heterogeneous nuclear ribonucleoprotein L OS=Homo sapiens OX=9606 GN=HNRNPL PE=1 SV=2	0.047117	0.00532384
		O43390	9	4	Heterogeneous nuclear ribonucleoprotein R OS=Homo sapiens OX=9606 GN=HNRNPR PE=1 SV=1	0.0718747	0.00197452
		P10412	5	4	Histone H1.4 OS=Homo sapiens OX=9606 GN=H1-4 PE=1 SV=2	0.284578	0.00797904
		P16401	4	4	Histone H1.5 OS=Homo sapiens OX=9606 GN=H1-5 PE=1 SV=3	0.270692	0.0103586
		P68431	5	4	Histone H3.1 OS=Homo sapiens OX=9606 GN=H3C1 PE=1 SV=2	0.98965	0.0105678
		P50502	4	4	Hsc70-interacting protein OS=Homo sapiens OX=9606 GN=ST13 PE=1 SV=2	0.048797	0.0022328
		Q6YP21	5	4	Kynurenine--oxoglutarate transaminase 3 OS=Homo sapiens OX=9606 GN=KYAT3 PE=1 SV=1	0.0210765	0.000878472
		Q96AG4	5	4	Leucine-rich repeat-containing protein 59 OS=Homo sapiens OX=9606 GN=LRRC59 PE=1 SV=1	0.0781691	0.0327753
		P05455	5	4	Lupus La protein OS=Homo sapiens OX=9606 GN=SSB PE=1 SV=2	0.0203511	0.00104083
		Q16891	5	4	MICOS complex subunit MIC60 OS=Homo sapiens OX=9606 GN=IMMT PE=1 SV=1	0.016551	0.000378057
		Q7Z406	13	4	Myosin-14 OS=Homo sapiens OX=9606 GN=MYH14 PE=1 SV=2	0.0370851	0.0109662
		P00387	4	4	NADH-cytochrome b5 reductase 3 OS=Homo sapiens OX=9606 GN=CYB5R3 PE=1 SV=3	0.128869	0.00497563
		P07196	5	4	Neurofilament light polypeptide OS=Homo sapiens OX=9606 GN=NEFL PE=1 SV=3	0.0599324	0.0335215
		Q15758	4	4	Neutral amino acid transporter B(0) OS=Homo sapiens OX=9606 GN=SLC1A5 PE=1 SV=2	0.0994277	0.00481568
		Q9NR30	4	4	Nucleolar RNA helicase 2 OS=Homo sapiens OX=9606 GN=DDX21 PE=1 SV=5	0.00632873	0.00162861
		P22392	4	4	Nucleoside diphosphate kinase B OS=Homo sapiens OX=9606 GN=NME2 PE=1 SV=1	0.173201	0.0462914
		Q13310	8	4	Polyadenylate-binding protein 4 OS=Homo sapiens OX=9606 GN=PABPC4 PE=1 SV=1	0.0147788	0.00582707
		P26599	4	4	Polypyrimidine tract-binding protein 1 OS=Homo sapiens OX=9606 GN=PTBP1 PE=1 SV=1	0.0760274	0.00233187
		P12004	5	4	Proliferating cell nuclear antigen OS=Homo sapiens OX=9606 GN=PCNA PE=1 SV=1	0.065906	0.00263644
		P25786	4	4	Proteasome subunit alpha type-1 OS=Homo sapiens OX=9606 GN=PSMA1 PE=1 SV=1	0.0497862	0.00148054
		P25787	4	4	Proteasome subunit alpha type-2 OS=Homo sapiens OX=9606 GN=PSMA2 PE=1 SV=2	0.105761	0.0122747
		P28066	4	4	Proteasome subunit alpha type-5 OS=Homo sapiens OX=9606 GN=PSMA5 PE=1 SV=3	0.0449148	0.000971002
		P60900	4	4	Proteasome subunit alpha type-6 OS=Homo sapiens OX=9606 GN=PSMA6 PE=1 SV=1	0.0413246	0.00529271
		P28074	4	4	Proteasome subunit beta type-5 OS=Homo sapiens OX=9606 GN=PSMB5 PE=1 SV=3	0.0248755	0.00270238
		P55735	5	4	Protein SEC13 homolog OS=Homo sapiens OX=9606 GN=SEC13 PE=1 SV=3	0.0487226	0.0173021
		Q5VWN6	5	4	Protein TASOR 2 OS=Homo sapiens OX=9606 GN=TASOR2 PE=1 SV=1	0.0668356	0.00268547
		P55786	5	4	Puromycin-sensitive aminopeptidase OS=Homo sapiens OX=9606 GN=NPEPPS PE=1 SV=2	0.0214643	0.00114159
		P60763	5	4	Ras-related C3 botulinum toxin substrate 3 OS=Homo sapiens OX=9606 GN=RAC3 PE=1 SV=1	0.104323	0.0194502
		P62820	6	4	Ras-related protein Rab-1A OS=Homo sapiens OX=9606 GN=RAB1A PE=1 SV=3	0.178961	0.00467771
		P51148	4	4	Ras-related protein Rab-5C OS=Homo sapiens OX=9606 GN=RAB5C PE=1 SV=2	0.0617349	0.00626854
		P61224	5	4	Ras-related protein Rap-1b OS=Homo sapiens OX=9606 GN=RAP1B PE=1 SV=1	0.0369474	0.00418892
		Q9Y265	4	4	RuvB-like 1 OS=Homo sapiens OX=9606 GN=RUVBL1 PE=1 SV=1	0.42161	0.018595
		Q9Y230	4	4	RuvB-like 2 OS=Homo sapiens OX=9606 GN=RUVBL2 PE=1 SV=3	0.0217042	0.00544007
		P30153	8	4	Serine/threonine-protein phosphatase 2A 65 kDa regulatory subunit A alpha isoform OS=Homo sapiens OX=9606 GN=PPP2R1A PE=1 SV=4	0.0273289	0.00113305
		P16949	5	4	Stathmin OS=Homo sapiens OX=9606 GN=STMN1 PE=1 SV=3	0.0291241	0.00109181
		P10599	5	4	Thioredoxin OS=Homo sapiens OX=9606 GN=TXN PE=1 SV=3	0.087807	0.00761132
		Q16881	4	4	Thioredoxin reductase 1_ cytoplasmic OS=Homo sapiens OX=9606 GN=TXNRD1 PE=1 SV=3	0.0339108	0.00368187
		P51571	4	4	Translocon-associated protein subunit delta OS=Homo sapiens OX=9606 GN=SSR4 PE=1 SV=1	0.0776848	0.0291528
		P09493	19	4	Tropomyosin alpha-1 chain OS=Homo sapiens OX=9606 GN=TPM1 PE=1 SV=2	0.435638	0.00925839
		P45974	4	4	Ubiquitin carboxyl-terminal hydrolase 5 OS=Homo sapiens OX=9606 GN=USP5 PE=1 SV=2	0.0208017	0.000772351
		P21796	5	4	Voltage-dependent anion-selective channel protein 1 OS=Homo sapiens OX=9606 GN=VDAC1 PE=1 SV=2	0.0554222	0.00237752
		P45880	4	4	Voltage-dependent anion-selective channel protein 2 OS=Homo sapiens OX=9606 GN=VDAC2 PE=1 SV=2	0.0518607	0.0132827
		P12956	6	4	X-ray repair cross-complementing protein 6 OS=Homo sapiens OX=9606 GN=XRCC6 PE=1 SV=2	0.0531199	0.000968368
		Q15029	4	3	116 kDa U5 small nuclear ribonucleoprotein component OS=Homo sapiens OX=9606 GN=EFTUD2 PE=1 SV=1	0.562699	0.149917
		P31946	8	3	14-3-3 protein beta/alpha OS=Homo sapiens OX=9606 GN=YWHAB PE=1 SV=3	0.039907	0.00310736
		Q04917	8	3	14-3-3 protein eta OS=Homo sapiens OX=9606 GN=YWHAH PE=1 SV=4	0.0296675	0.00172308
		P61981	8	3	14-3-3 protein gamma OS=Homo sapiens OX=9606 GN=YWHAG PE=1 SV=2	0.0579852	0.000471459
		P27348	8	3	14-3-3 protein theta OS=Homo sapiens OX=9606 GN=YWHAQ PE=1 SV=1	0.051778	0.000525775
		O00232	3	3	26S proteasome non-ATPase regulatory subunit 12 OS=Homo sapiens OX=9606 GN=PSMD12 PE=1 SV=3	0.0206489	0.00122693
		O43242	3	3	26S proteasome non-ATPase regulatory subunit 3 OS=Homo sapiens OX=9606 GN=PSMD3 PE=1 SV=2	0.0224774	0.00260038
		P43686	3	3	26S proteasome regulatory subunit 6B OS=Homo sapiens OX=9606 GN=PSMC4 PE=1 SV=2	0.333342	0.00469639
		P25398	3	3	40S ribosomal protein S12 OS=Homo sapiens OX=9606 GN=RPS12 PE=1 SV=3	0.0709611	0.0108562
		P62249	3	3	40S ribosomal protein S16 OS=Homo sapiens OX=9606 GN=RPS16 PE=1 SV=2	0.136459	0.00154005
		P60866	3	3	40S ribosomal protein S20 OS=Homo sapiens OX=9606 GN=RPS20 PE=1 SV=1	0.0839508	0.0031753
		P62847	3	3	40S ribosomal protein S24 OS=Homo sapiens OX=9606 GN=RPS24 PE=1 SV=1	0.0331801	0.00292486
		P62851	3	3	40S ribosomal protein S25 OS=Homo sapiens OX=9606 GN=RPS25 PE=1 SV=1	0.112511	0.00711507
		P61247	5	3	40S ribosomal protein S3a OS=Homo sapiens OX=9606 GN=RPS3A PE=1 SV=2	0.0766908	0.00221989
		P46782	3	3	40S ribosomal protein S5 OS=Homo sapiens OX=9606 GN=RPS5 PE=1 SV=4	0.148959	0.0102325
		P62753	3	3	40S ribosomal protein S6 OS=Homo sapiens OX=9606 GN=RPS6 PE=1 SV=1	0.10647	0.0018606
		P62906	4	3	60S ribosomal protein L10a OS=Homo sapiens OX=9606 GN=RPL10A PE=1 SV=2	0.103793	0.0206425
		P61313	4	3	60S ribosomal protein L15 OS=Homo sapiens OX=9606 GN=RPL15 PE=1 SV=2	0.133626	0.00585196
		Q02543	4	3	60S ribosomal protein L18a OS=Homo sapiens OX=9606 GN=RPL18A PE=1 SV=2	0.0665909	0.0132938
		P84098	3	3	60S ribosomal protein L19 OS=Homo sapiens OX=9606 GN=RPL19 PE=1 SV=1	0.0755584	0.00201688
		P62899	3	3	60S ribosomal protein L31 OS=Homo sapiens OX=9606 GN=RPL31 PE=1 SV=1	0.0734608	0.001963
		P53999	3	3	Activated RNA polymerase II transcriptional coactivator p15 OS=Homo sapiens OX=9606 GN=SUB1 PE=1 SV=3	0.0359361	0.00335399
		P61204	6	3	ADP-ribosylation factor 3 OS=Homo sapiens OX=9606 GN=ARF3 PE=1 SV=2	0.0984914	0.0059139
		P18085	6	3	ADP-ribosylation factor 4 OS=Homo sapiens OX=9606 GN=ARF4 PE=1 SV=3	0.163216	0.00789135
		P11766	3	3	Alcohol dehydrogenase class-3 OS=Homo sapiens OX=9606 GN=ADH5 PE=1 SV=4	0.0408598	0.00162246
		P35609	12	3	Alpha-actinin-2 OS=Homo sapiens OX=9606 GN=ACTN2 PE=1 SV=1	0.0125501	0.00157798
		Q8TDY4	4	3	Arf-GAP with SH3 domain_ ANK repeat and PH domain-containing protein 3 OS=Homo sapiens OX=9606 GN=ASAP3 PE=1 SV=1	0.0125504	0.000893774
		O43776	4	3	Asparagine--tRNA ligase_ cytoplasmic OS=Homo sapiens OX=9606 GN=NARS1 PE=1 SV=1	0.0123239	0.00235777
		O00571	5	3	ATP-dependent RNA helicase DDX3X OS=Homo sapiens OX=9606 GN=DDX3X PE=1 SV=3	0.0265575	0.00146104
		P07384	3	3	Calpain-1 catalytic subunit OS=Homo sapiens OX=9606 GN=CAPN1 PE=1 SV=1	0.0236572	0.00109082
		P16152	5	3	Carbonyl reductase [NADPH] 1 OS=Homo sapiens OX=9606 GN=CBR1 PE=1 SV=3	0.0290736	0.00298784
		P07858	3	3	Cathepsin B OS=Homo sapiens OX=9606 GN=CTSB PE=1 SV=3	0.112537	0.00572267
		Q8IYE0	3	3	Coiled-coil domain-containing protein 146 OS=Homo sapiens OX=9606 GN=CCDC146 PE=1 SV=2	0.724358	0.016219
		Q9P0M6	3	3	Core histone macro-H2A.2 OS=Homo sapiens OX=9606 GN=MACROH2A2 PE=1 SV=3	0.0250944	0.00339778
		Q92793	4	3	CREB-binding protein OS=Homo sapiens OX=9606 GN=CREBBP PE=1 SV=3	0.00672912	0.00239662
		P31930	4	3	Cytochrome b-c1 complex subunit 1_ mitochondrial OS=Homo sapiens OX=9606 GN=UQCRC1 PE=1 SV=3	0.0428933	0.0251932
		O00154	3	3	Cytosolic acyl coenzyme A thioester hydrolase OS=Homo sapiens OX=9606 GN=ACOT7 PE=1 SV=3	0.0139183	0.00123139
		P36957	3	3	Dihydrolipoyllysine-residue succinyltransferase component of 2-oxoglutarate dehydrogenase complex_ mitochondrial OS=Homo sapiens OX=9606 GN=DLST PE=1 SV=4	0.00567023	0.00131397
		P98082	4	3	Disabled homolog 2 OS=Homo sapiens OX=9606 GN=DAB2 PE=1 SV=3	0.0981955	0.00102446
		Q6ZMW3	5	3	Echinoderm microtubule-associated protein-like 6 OS=Homo sapiens OX=9606 GN=EML6 PE=2 SV=2	0.141389	0.00575207
		P29692	4	3	Elongation factor 1-delta OS=Homo sapiens OX=9606 GN=EEF1D PE=1 SV=5	0.0539452	0.00453278
		P41091	3	3	Eukaryotic translation initiation factor 2 subunit 3 OS=Homo sapiens OX=9606 GN=EIF2S3 PE=1 SV=3	0.117781	0.0100589
		P52907	4	3	F-actin-capping protein subunit alpha-1 OS=Homo sapiens OX=9606 GN=CAPZA1 PE=1 SV=3	0.0559857	0.000830381
		P47756	3	3	F-actin-capping protein subunit beta OS=Homo sapiens OX=9606 GN=CAPZB PE=1 SV=4	0.0658937	0.00116546
		Q14192	3	3	Four and a half LIM domains protein 2 OS=Homo sapiens OX=9606 GN=FHL2 PE=1 SV=3	0.00798125	0.000653891
		P09972	3	3	Fructose-bisphosphate aldolase C OS=Homo sapiens OX=9606 GN=ALDOC PE=1 SV=2	0.410848	0.0799505
		P09104	6	3	Gamma-enolase OS=Homo sapiens OX=9606 GN=ENO2 PE=1 SV=3	0.0224513	0.00133794
		P09211	3	3	Glutathione S-transferase P OS=Homo sapiens OX=9606 GN=GSTP1 PE=1 SV=2	0.0853238	0.00992665
		P51991	5	3	Heterogeneous nuclear ribonucleoprotein A3 OS=Homo sapiens OX=9606 GN=HNRNPA3 PE=1 SV=2	0.0234187	0.00410808
		P12081	6	3	Histidine--tRNA ligase_ cytoplasmic OS=Homo sapiens OX=9606 GN=HARS1 PE=1 SV=2	0.0302001	0.0072256
		Q9Y4L1	3	3	Hypoxia up-regulated protein 1 OS=Homo sapiens OX=9606 GN=HYOU1 PE=1 SV=1	0.00869125	0.00222253
		O75874	4	3	Isocitrate dehydrogenase [NADP] cytoplasmic OS=Homo sapiens OX=9606 GN=IDH1 PE=1 SV=2	0.0367449	0.00712255
		Q8WWI1	3	3	LIM domain only protein 7 OS=Homo sapiens OX=9606 GN=LMO7 PE=1 SV=3	0.0633584	0.00672881
		Q8TE76	3	3	MORC family CW-type zinc finger protein 4 OS=Homo sapiens OX=9606 GN=MORC4 PE=1 SV=2	0.0962929	0.000672868
		Q96S97	3	3	Myeloid-associated differentiation marker OS=Homo sapiens OX=9606 GN=MYADM PE=1 SV=2	0.0367844	0.0038923
		P29966	3	3	Myristoylated alanine-rich C-kinase substrate OS=Homo sapiens OX=9606 GN=MARCKS PE=1 SV=4	0.031808	0.00395277
		Q0ZGT2	3	3	Nexilin OS=Homo sapiens OX=9606 GN=NEXN PE=1 SV=1	0.0947651	0.00688738
		O60437	3	3	Periplakin OS=Homo sapiens OX=9606 GN=PPL PE=1 SV=4	0.192103	0.00543867
		P32119	4	3	Peroxiredoxin-2 OS=Homo sapiens OX=9606 GN=PRDX2 PE=1 SV=5	0.0647765	0.00271098
		Q13162	5	3	Peroxiredoxin-4 OS=Homo sapiens OX=9606 GN=PRDX4 PE=1 SV=1	0.029138	0.00098378
		Q15365	5	3	Poly(rC)-binding protein 1 OS=Homo sapiens OX=9606 GN=PCBP1 PE=1 SV=2	0.0454372	0.00321678
		P17844	7	3	Probable ATP-dependent RNA helicase DDX5 OS=Homo sapiens OX=9606 GN=DDX5 PE=1 SV=1	0.0347767	0.00437835
		Q02809	3	3	Procollagen-lysine_2-oxoglutarate 5-dioxygenase 1 OS=Homo sapiens OX=9606 GN=PLOD1 PE=1 SV=2	0.0125731	0.00211475
		Q14914	3	3	Prostaglandin reductase 1 OS=Homo sapiens OX=9606 GN=PTGR1 PE=1 SV=2	0.516632	0.0824929
		P25789	3	3	Proteasome subunit alpha type-4 OS=Homo sapiens OX=9606 GN=PSMA4 PE=1 SV=1	0.0666499	0.0048735
		O14818	3	3	Proteasome subunit alpha type-7 OS=Homo sapiens OX=9606 GN=PSMA7 PE=1 SV=1	0.0444084	0.00396955
		P49720	3	3	Proteasome subunit beta type-3 OS=Homo sapiens OX=9606 GN=PSMB3 PE=1 SV=2	0.0318532	0.00164613
		P28072	3	3	Proteasome subunit beta type-6 OS=Homo sapiens OX=9606 GN=PSMB6 PE=1 SV=4	0.0364909	0.00104043
		Q96TA1	3	3	Protein Niban 2 OS=Homo sapiens OX=9606 GN=NIBAN2 PE=1 SV=3	0.0155051	0.00257178
		Q9Y570	4	3	Protein phosphatase methylesterase 1 OS=Homo sapiens OX=9606 GN=PPME1 PE=1 SV=3	0.0249952	0.00216905
		Q15436	8	3	Protein transport protein Sec23A OS=Homo sapiens OX=9606 GN=SEC23A PE=1 SV=2	0.0343604	0.0126703
		P61619	3	3	Protein transport protein Sec61 subunit alpha isoform 1 OS=Homo sapiens OX=9606 GN=SEC61A1 PE=1 SV=2	0.0509233	0.00279698
		P06454	3	3	Prothymosin alpha OS=Homo sapiens OX=9606 GN=PTMA PE=1 SV=2	0.12034	0.00425052
		P46060	4	3	Ran GTPase-activating protein 1 OS=Homo sapiens OX=9606 GN=RANGAP1 PE=1 SV=1	0.0618328	0.00242246
		P43487	3	3	Ran-specific GTPase-activating protein OS=Homo sapiens OX=9606 GN=RANBP1 PE=1 SV=1	0.037763	0.00252895
		P61026	6	3	Ras-related protein Rab-10 OS=Homo sapiens OX=9606 GN=RAB10 PE=1 SV=1	0.045027	0.00124231
		P62491	4	3	Ras-related protein Rab-11A OS=Homo sapiens OX=9606 GN=RAB11A PE=1 SV=3	0.035316	0.00588985
		Q9NP72	3	3	Ras-related protein Rab-18 OS=Homo sapiens OX=9606 GN=RAB18 PE=1 SV=1	0.0157848	0.00283494
		P61019	3	3	Ras-related protein Rab-2A OS=Homo sapiens OX=9606 GN=RAB2A PE=1 SV=1	0.0406068	0.00199967
		P20337	6	3	Ras-related protein Rab-3B OS=Homo sapiens OX=9606 GN=RAB3B PE=1 SV=2	0.0371854	0.0010442
		Q96T23	4	3	Remodeling and spacing factor 1 OS=Homo sapiens OX=9606 GN=RSF1 PE=1 SV=2	0.28142	0.00125378
		P52565	3	3	Rho GDP-dissociation inhibitor 1 OS=Homo sapiens OX=9606 GN=ARHGDIA PE=1 SV=3	0.13798	0.00424002
		P35637	5	3	RNA-binding protein FUS OS=Homo sapiens OX=9606 GN=FUS PE=1 SV=1	0.0107492	0.00337666
		Q15020	3	3	Squamous cell carcinoma antigen recognized by T-cells 3 OS=Homo sapiens OX=9606 GN=SART3 PE=1 SV=1	0.0689322	0.00829972
		P30048	3	3	Thioredoxin-dependent peroxide reductase_ mitochondrial OS=Homo sapiens OX=9606 GN=PRDX3 PE=1 SV=3	0.0374278	0.000754982
		P13693	3	3	Translationally-controlled tumor protein OS=Homo sapiens OX=9606 GN=TPT1 PE=1 SV=1	0.031958	0.00310884
		P06753	15	3	Tropomyosin alpha-3 chain OS=Homo sapiens OX=9606 GN=TPM3 PE=1 SV=2	0.0820835	0.000929611
		P68036	3	3	Ubiquitin-conjugating enzyme E2 L3 OS=Homo sapiens OX=9606 GN=UBE2L3 PE=1 SV=1	0.103492	0.0259732
		Q6ZQQ6	4	3	WD repeat-containing protein 87 OS=Homo sapiens OX=9606 GN=WDR87 PE=1 SV=3	0.0849981	0.00398091
		P13010	4	3	X-ray repair cross-complementing protein 5 OS=Homo sapiens OX=9606 GN=XRCC5 PE=1 SV=3	0.0579727	0.00795046
		P62191	3	2	26S proteasome regulatory subunit 4 OS=Homo sapiens OX=9606 GN=PSMC1 PE=1 SV=1	0.0292255	0.0020682
		P17980	2	2	26S proteasome regulatory subunit 6A OS=Homo sapiens OX=9606 GN=PSMC3 PE=1 SV=3	0.0752103	0.0358044
		P62263	2	2	40S ribosomal protein S14 OS=Homo sapiens OX=9606 GN=RPS14 PE=1 SV=3	0.0477682	0.00419135
		P08708	2	2	40S ribosomal protein S17 OS=Homo sapiens OX=9606 GN=RPS17 PE=1 SV=2	0.0676248	0.0101018
		P62854	2	2	40S ribosomal protein S26 OS=Homo sapiens OX=9606 GN=RPS26 PE=1 SV=3	0.111114	0.00738032
		P27635	2	2	60S ribosomal protein L10 OS=Homo sapiens OX=9606 GN=RPL10 PE=1 SV=4	0.027529	0.00318353
		P62913	2	2	60S ribosomal protein L11 OS=Homo sapiens OX=9606 GN=RPL11 PE=1 SV=2	0.120471	0.00556846
		P26373	2	2	60S ribosomal protein L13 OS=Homo sapiens OX=9606 GN=RPL13 PE=1 SV=4	0.0271902	0.00717398
		P18621	2	2	60S ribosomal protein L17 OS=Homo sapiens OX=9606 GN=RPL17 PE=1 SV=3	0.0196521	0.0121369
		P62750	2	2	60S ribosomal protein L23a OS=Homo sapiens OX=9606 GN=RPL23A PE=1 SV=1	0.0566823	0.0035446
		P83731	2	2	60S ribosomal protein L24 OS=Homo sapiens OX=9606 GN=RPL24 PE=1 SV=1	0.0490668	0.00251601
		P61254	3	2	60S ribosomal protein L26 OS=Homo sapiens OX=9606 GN=RPL26 PE=1 SV=1	0.085787	0.0112276
		P46776	2	2	60S ribosomal protein L27a OS=Homo sapiens OX=9606 GN=RPL27A PE=1 SV=2	0.0325212	0.000508232
		P62888	2	2	60S ribosomal protein L30 OS=Homo sapiens OX=9606 GN=RPL30 PE=1 SV=2	0.121344	0.00535622
		P49207	2	2	60S ribosomal protein L34 OS=Homo sapiens OX=9606 GN=RPL34 PE=1 SV=3	0.0659716	0.00010343
		P22303	3	2	Acetylcholinesterase OS=Homo sapiens OX=9606 GN=ACHE PE=1 SV=1	0.0906082	0.0315631
		P39687	3	2	Acidic leucine-rich nuclear phosphoprotein 32 family member A OS=Homo sapiens OX=9606 GN=ANP32A PE=1 SV=1	0.0250248	0.00248309
		Q99798	2	2	Aconitate hydratase_ mitochondrial OS=Homo sapiens OX=9606 GN=ACO2 PE=1 SV=2	0.0206933	0.00980669
		O15511	2	2	Actin-related protein 2/3 complex subunit 5 OS=Homo sapiens OX=9606 GN=ARPC5 PE=1 SV=3	0.0364667	0.00265234
		O95433	2	2	Activator of 90 kDa heat shock protein ATPase homolog 1 OS=Homo sapiens OX=9606 GN=AHSA1 PE=1 SV=1	0.016197	0.0019529
		P40616	3	2	ADP-ribosylation factor-like protein 1 OS=Homo sapiens OX=9606 GN=ARL1 PE=1 SV=1	0.0223698	0.00302806
		Q08043	11	2	Alpha-actinin-3 OS=Homo sapiens OX=9606 GN=ACTN3 PE=1 SV=2	0.0183641	0.00131036
		Q16352	4	2	Alpha-internexin OS=Homo sapiens OX=9606 GN=INA PE=1 SV=2	0.0167014	0.00184062
		Q10567	6	2	AP-1 complex subunit beta-1 OS=Homo sapiens OX=9606 GN=AP1B1 PE=1 SV=2	0.0556215	0.00436855
		P63010	7	2	AP-2 complex subunit beta OS=Homo sapiens OX=9606 GN=AP2B1 PE=1 SV=1	0.00875941	0.000944077
		Q96CW1	2	2	AP-2 complex subunit mu OS=Homo sapiens OX=9606 GN=AP2M1 PE=1 SV=2	0.0129927	0.000643818
		P14868	2	2	Aspartate--tRNA ligase_ cytoplasmic OS=Homo sapiens OX=9606 GN=DARS1 PE=1 SV=2	0.0291749	0.000352568
		Q6PL18	3	2	ATPase family AAA domain-containing protein 2 OS=Homo sapiens OX=9606 GN=ATAD2 PE=1 SV=1	0.0294489	0.0109062
		O95816	3	2	BAG family molecular chaperone regulator 2 OS=Homo sapiens OX=9606 GN=BAG2 PE=1 SV=1	0.0192807	0.000397962
		P35613	2	2	Basigin OS=Homo sapiens OX=9606 GN=BSG PE=1 SV=2	0.0456386	0.00329818
		P53004	2	2	Biliverdin reductase A OS=Homo sapiens OX=9606 GN=BLVRA PE=1 SV=2	0.0639216	0.0259299
		Q9Y240	2	2	C-type lectin domain family 11 member A OS=Homo sapiens OX=9606 GN=CLEC11A PE=1 SV=1	0.0734844	0.000597827
		P0DP23	2	2	Calmodulin-1 OS=Homo sapiens OX=9606 GN=CALM1 PE=1 SV=1	0.164973	0.00693167
		P35221	2	2	Catenin alpha-1 OS=Homo sapiens OX=9606 GN=CTNNA1 PE=1 SV=1	0.0237825	0.00133213
		P11717	3	2	Cation-independent mannose-6-phosphate receptor OS=Homo sapiens OX=9606 GN=IGF2R PE=1 SV=3	0.0163762	0.00526705
		P53675	11	2	Clathrin heavy chain 2 OS=Homo sapiens OX=9606 GN=CLTCL1 PE=1 SV=2	0.0250938	0.000706624
		Q2TAC2	3	2	Coiled-coil domain-containing protein 57 OS=Homo sapiens OX=9606 GN=CCDC57 PE=1 SV=3	0.00851336	0.00287098
		P04839	2	2	Cytochrome b-245 heavy chain OS=Homo sapiens OX=9606 GN=CYBB PE=1 SV=2	0.0155396	0.00149301
		Q96KP4	2	2	Cytosolic non-specific dipeptidase OS=Homo sapiens OX=9606 GN=CNDP2 PE=1 SV=2	0.0286404	0.00018969
		P17661	8	2	Desmin OS=Homo sapiens OX=9606 GN=DES PE=1 SV=3	0.00270799	0.000182763
		Q6W0C5	2	2	Developmental pluripotency-associated protein 3 OS=Homo sapiens OX=9606 GN=DPPA3 PE=1 SV=1	0.176863	0.123552
		Q16555	5	2	Dihydropyrimidinase-related protein 2 OS=Homo sapiens OX=9606 GN=DPYSL2 PE=1 SV=1	0.0366438	0.00439265
		Q16643	2	2	Drebrin OS=Homo sapiens OX=9606 GN=DBN1 PE=1 SV=4	0.0296235	0.00229234
		Q9NRD8	4	2	Dual oxidase 2 OS=Homo sapiens OX=9606 GN=DUOX2 PE=1 SV=2	0.0230311	0.0196215
		Q63HN8	2	2	E3 ubiquitin-protein ligase RNF213 OS=Homo sapiens OX=9606 GN=RNF213 PE=1 SV=3	0.024234	0.00939315
		P13804	2	2	Electron transfer flavoprotein subunit alpha_ mitochondrial OS=Homo sapiens OX=9606 GN=ETFA PE=1 SV=1	0.0135261	0.00181919
		P63135	2	2	Endogenous retrovirus group K member 7 Pol protein OS=Homo sapiens OX=9606 GN=ERVK-7 PE=3 SV=1	0.0819266	0.00382732
		O75477	2	2	Erlin-1 OS=Homo sapiens OX=9606 GN=ERLIN1 PE=1 SV=2	0.00933218	0.00101224
		P60842	9	2	Eukaryotic initiation factor 4A-I OS=Homo sapiens OX=9606 GN=EIF4A1 PE=1 SV=1	0.211743	0.00495498
		Q14240	7	2	Eukaryotic initiation factor 4A-II OS=Homo sapiens OX=9606 GN=EIF4A2 PE=1 SV=2	0.0804263	0.00188204
		P05198	3	2	Eukaryotic translation initiation factor 2 subunit 1 OS=Homo sapiens OX=9606 GN=EIF2S1 PE=1 SV=3	0.0473587	0.00300727
		P20042	2	2	Eukaryotic translation initiation factor 2 subunit 2 OS=Homo sapiens OX=9606 GN=EIF2S2 PE=1 SV=2	0.00934929	0.00183559
		O00303	2	2	Eukaryotic translation initiation factor 3 subunit F OS=Homo sapiens OX=9606 GN=EIF3F PE=1 SV=1	0.0206823	0.00448688
		P56537	2	2	Eukaryotic translation initiation factor 6 OS=Homo sapiens OX=9606 GN=EIF6 PE=1 SV=1	0.0268414	0.00184214
		Q9NQT5	2	2	Exosome complex component RRP40 OS=Homo sapiens OX=9606 GN=EXOSC3 PE=1 SV=3	0.00446587	0.00150711
		P47755	3	2	F-actin-capping protein subunit alpha-2 OS=Homo sapiens OX=9606 GN=CAPZA2 PE=1 SV=3	0.0522518	0.0010517
		Q04609	2	2	Glutamate carboxypeptidase 2 OS=Homo sapiens OX=9606 GN=FOLH1 PE=1 SV=1	0.0612526	0.00119249
		P06737	4	2	Glycogen phosphorylase_ liver form OS=Homo sapiens OX=9606 GN=PYGL PE=1 SV=4	0.0153501	0.00238647
		Q9NR31	2	2	GTP-binding protein SAR1a OS=Homo sapiens OX=9606 GN=SAR1A PE=1 SV=1	0.0545686	0.0259029
		P04899	3	2	Guanine nucleotide-binding protein G(i) subunit alpha-2 OS=Homo sapiens OX=9606 GN=GNAI2 PE=1 SV=3	0.0200275	0.00081604
		P62873	4	2	Guanine nucleotide-binding protein G(I)/G(S)/G(T) subunit beta-1 OS=Homo sapiens OX=9606 GN=GNB1 PE=1 SV=3	0.0288769	0.00207816
		Q03113	3	2	Guanine nucleotide-binding protein subunit alpha-12 OS=Homo sapiens OX=9606 GN=GNA12 PE=1 SV=4	0.0103289	0.0024554
		Q14344	3	2	Guanine nucleotide-binding protein subunit alpha-13 OS=Homo sapiens OX=9606 GN=GNA13 PE=1 SV=2	0.0247801	0.00136193
		P54652	16	2	Heat shock-related 70 kDa protein 2 OS=Homo sapiens OX=9606 GN=HSPA2 PE=1 SV=1	0.0370261	0.00103918
		Q5SSJ5	2	2	Heterochromatin protein 1-binding protein 3 OS=Homo sapiens OX=9606 GN=HP1BP3 PE=1 SV=1	0.0156517	0.00131858
		O14979	4	2	Heterogeneous nuclear ribonucleoprotein D-like OS=Homo sapiens OX=9606 GN=HNRNPDL PE=1 SV=3	0.0577706	0.00397127
		P52597	3	2	Heterogeneous nuclear ribonucleoprotein F OS=Homo sapiens OX=9606 GN=HNRNPF PE=1 SV=3	0.0453191	0.00089732
		P52272	3	2	Heterogeneous nuclear ribonucleoprotein M OS=Homo sapiens OX=9606 GN=HNRNPM PE=1 SV=3	0.0241208	0.00088083
		P07910	4	2	Heterogeneous nuclear ribonucleoproteins C1/C2 OS=Homo sapiens OX=9606 GN=HNRNPC PE=1 SV=4	0.038649	0.00262395
		P04908	4	2	Histone H2A type 1-B/E OS=Homo sapiens OX=9606 GN=H2AC4 PE=1 SV=2	2.03209	0.22128
		O60814	6	2	Histone H2B type 1-K OS=Homo sapiens OX=9606 GN=H2BC12 PE=1 SV=3	1.49786	0.00710545
		Q16543	3	2	Hsp90 co-chaperone Cdc37 OS=Homo sapiens OX=9606 GN=CDC37 PE=1 SV=1	0.0224221	0.000858712
		P00492	2	2	Hypoxanthine-guanine phosphoribosyltransferase OS=Homo sapiens OX=9606 GN=HPRT1 PE=1 SV=2	0.0143575	0.00189958
		Q15181	3	2	Inorganic pyrophosphatase OS=Homo sapiens OX=9606 GN=PPA1 PE=1 SV=2	0.0206103	0.00271861
		O95198	2	2	Kelch-like protein 2 OS=Homo sapiens OX=9606 GN=KLHL2 PE=1 SV=2	0.116034	0.0843916
		Q9NS87	3	2	Kinesin-like protein KIF15 OS=Homo sapiens OX=9606 GN=KIF15 PE=1 SV=1	0.0290969	0.00095436
		P11310	3	2	Medium-chain specific acyl-CoA dehydrogenase_ mitochondrial OS=Homo sapiens OX=9606 GN=ACADM PE=1 SV=1	0.0503042	0.00457184
		P55145	2	2	Mesencephalic astrocyte-derived neurotrophic factor OS=Homo sapiens OX=9606 GN=MANF PE=1 SV=3	0.0248463	0.00156048
		Q96T58	3	2	Msx2-interacting protein OS=Homo sapiens OX=9606 GN=SPEN PE=1 SV=1	0.062677	0.00336432
		O60568	3	2	Multifunctional procollagen lysine hydroxylase and glycosyltransferase LH3 OS=Homo sapiens OX=9606 GN=PLOD3 PE=1 SV=1	0.0159187	0.000521056
		Q969H8	2	2	Myeloid-derived growth factor OS=Homo sapiens OX=9606 GN=MYDGF PE=1 SV=1	0.188606	0.00400962
		O14950	4	2	Myosin regulatory light chain 12B OS=Homo sapiens OX=9606 GN=MYL12B PE=1 SV=2	0.139015	0.00158451
		P24844	4	2	Myosin regulatory light polypeptide 9 OS=Homo sapiens OX=9606 GN=MYL9 PE=1 SV=4	0.0309819	0.002201
		P15586	3	2	N-acetylglucosamine-6-sulfatase OS=Homo sapiens OX=9606 GN=GNS PE=1 SV=3	0.0173454	0.00331852
		E9PAV3	2	2	Nascent polypeptide-associated complex subunit alpha_ muscle-specific form OS=Homo sapiens OX=9606 GN=NACA PE=1 SV=1	0.0188219	0.00294452
		P61081	4	2	NEDD8-conjugating enzyme Ubc12 OS=Homo sapiens OX=9606 GN=UBE2M PE=1 SV=1	0.00983063	0.00138062
		Q6PIU2	3	2	Neutral cholesterol ester hydrolase 1 OS=Homo sapiens OX=9606 GN=NCEH1 PE=1 SV=3	0.00722898	0.000863776
		P20962	2	2	Parathymosin OS=Homo sapiens OX=9606 GN=PTMS PE=1 SV=2	0.156629	0.00169143
		Q96AY3	4	2	Peptidyl-prolyl cis-trans isomerase FKBP10 OS=Homo sapiens OX=9606 GN=FKBP10 PE=1 SV=1	0.0464469	0.00313698
		P62942	2	2	Peptidyl-prolyl cis-trans isomerase FKBP1A OS=Homo sapiens OX=9606 GN=FKBP1A PE=1 SV=2	0.0246518	0.00174586
		P41219	9	2	Peripherin OS=Homo sapiens OX=9606 GN=PRPH PE=1 SV=2	0.00775667	0.00292971
		P13796	7	2	Plastin-2 OS=Homo sapiens OX=9606 GN=LCP1 PE=1 SV=6	0.228403	0.0187314
		P43034	2	2	Platelet-activating factor acetylhydrolase IB subunit alpha OS=Homo sapiens OX=9606 GN=PAFAH1B1 PE=1 SV=2	0.0133057	0.000425668
		O75051	3	2	Plexin-A2 OS=Homo sapiens OX=9606 GN=PLXNA2 PE=1 SV=4	0.00909911	0.00102858
		O95271	2	2	Poly [ADP-ribose] polymerase tankyrase-1 OS=Homo sapiens OX=9606 GN=TNKS PE=1 SV=2	0.0221388	0.00288883
		Q4VXU2	5	2	Polyadenylate-binding protein 1-like OS=Homo sapiens OX=9606 GN=PABPC1L PE=2 SV=1	0.0486645	0.000863637
		Q9NQI0	3	2	Probable ATP-dependent RNA helicase DDX4 OS=Homo sapiens OX=9606 GN=DDX4 PE=1 SV=2	0.144451	0.00576341
		P25788	2	2	Proteasome subunit alpha type-3 OS=Homo sapiens OX=9606 GN=PSMA3 PE=1 SV=2	0.0149388	0.000995148
		P20618	2	2	Proteasome subunit beta type-1 OS=Homo sapiens OX=9606 GN=PSMB1 PE=1 SV=2	0.0469709	0.00506847
		Q8IX03	3	2	Protein KIBRA OS=Homo sapiens OX=9606 GN=WWC1 PE=1 SV=1	0.0311203	0.00288616
		Q9Y6V0	3	2	Protein piccolo OS=Homo sapiens OX=9606 GN=PCLO PE=1 SV=5	0.0212117	0.000861
		P06703	2	2	Protein S100-A6 OS=Homo sapiens OX=9606 GN=S100A6 PE=1 SV=1	0.0416272	0.000993852
		Q15437	6	2	Protein transport protein Sec23B OS=Homo sapiens OX=9606 GN=SEC23B PE=1 SV=2	0.00895199	0.000251415
		Q9BSA4	2	2	Protein tweety homolog 2 OS=Homo sapiens OX=9606 GN=TTYH2 PE=1 SV=3	0.834892	0.037567
		Q53FA7	3	2	Quinone oxidoreductase PIG3 OS=Homo sapiens OX=9606 GN=TP53I3 PE=1 SV=2	0.049078	0.000545622
		P31150	6	2	Rab GDP dissociation inhibitor alpha OS=Homo sapiens OX=9606 GN=GDI1 PE=1 SV=2	0.0660414	0.00583251
		Q2PPJ7	4	2	Ral GTPase-activating protein subunit alpha-2 OS=Homo sapiens OX=9606 GN=RALGAPA2 PE=1 SV=2	0.00855885	0.000370966
		Q15404	2	2	Ras suppressor protein 1 OS=Homo sapiens OX=9606 GN=RSU1 PE=1 SV=3	0.0350565	0.00342024
		P61106	4	2	Ras-related protein Rab-14 OS=Homo sapiens OX=9606 GN=RAB14 PE=1 SV=4	0.0128601	0.00147691
		Q15771	3	2	Ras-related protein Rab-30 OS=Homo sapiens OX=9606 GN=RAB30 PE=1 SV=2	0.0720312	0.0103872
		P20340	3	2	Ras-related protein Rab-6A OS=Homo sapiens OX=9606 GN=RAB6A PE=1 SV=3	0.0175009	0.00245485
		P40937	2	2	Replication factor C subunit 5 OS=Homo sapiens OX=9606 GN=RFC5 PE=1 SV=1	0.174483	0.0094834
		Q9H9Y2	2	2	Ribosome production factor 1 OS=Homo sapiens OX=9606 GN=RPF1 PE=1 SV=2	0.0249876	0.00144449
		P38159	4	2	RNA-binding motif protein_ X chromosome OS=Homo sapiens OX=9606 GN=RBMX PE=1 SV=3	0.0542621	0.00213059
		P31153	2	2	S-adenosylmethionine synthase isoform type-2 OS=Homo sapiens OX=9606 GN=MAT2A PE=1 SV=1	0.0281204	0.00207343
		P62140	2	2	Serine/threonine-protein phosphatase PP1-beta catalytic subunit OS=Homo sapiens OX=9606 GN=PPP1CB PE=1 SV=3	0.0122375	0.00161369
		P37108	3	2	Signal recognition particle 14 kDa protein OS=Homo sapiens OX=9606 GN=SRP14 PE=1 SV=2	0.039172	0.00192567
		P62316	2	2	Small nuclear ribonucleoprotein Sm D2 OS=Homo sapiens OX=9606 GN=SNRPD2 PE=1 SV=1	0.0248157	0.00545372
		P62318	2	2	Small nuclear ribonucleoprotein Sm D3 OS=Homo sapiens OX=9606 GN=SNRPD3 PE=1 SV=1	0.0355527	0.000523572
		Q5VX52	3	2	Spermatogenesis-associated protein 1 OS=Homo sapiens OX=9606 GN=SPATA1 PE=2 SV=4	0.0313728	0.00143805
		Q13838	7	2	Spliceosome RNA helicase DDX39B OS=Homo sapiens OX=9606 GN=DDX39B PE=1 SV=1	0.0380966	0.00167149
		P31040	2	2	Succinate dehydrogenase [ubiquinone] flavoprotein subunit_ mitochondrial OS=Homo sapiens OX=9606 GN=SDHA PE=1 SV=2	0.00269289	0.000407594
		Q9Y4G6	9	2	Talin-2 OS=Homo sapiens OX=9606 GN=TLN2 PE=1 SV=4	0.156237	0.0858839
		Q99973	2	2	Telomerase protein component 1 OS=Homo sapiens OX=9606 GN=TEP1 PE=1 SV=2	0.0227926	0.00434481
		P04216	2	2	Thy-1 membrane glycoprotein OS=Homo sapiens OX=9606 GN=THY1 PE=1 SV=2	0.0703757	0.00288342
		Q9UH73	2	2	Transcription factor COE1 OS=Homo sapiens OX=9606 GN=EBF1 PE=1 SV=2	0.030613	0.00302865
		P43307	2	2	Translocon-associated protein subunit alpha OS=Homo sapiens OX=9606 GN=SSR1 PE=1 SV=3	0.0699685	0.000360605
		Q15363	2	2	Transmembrane emp24 domain-containing protein 2 OS=Homo sapiens OX=9606 GN=TMED2 PE=1 SV=1	0.0292326	0.000545416
		Q9BTV4	2	2	Transmembrane protein 43 OS=Homo sapiens OX=9606 GN=TMEM43 PE=1 SV=1	0.0174571	0.00525743
		P40939	3	2	Trifunctional enzyme subunit alpha_ mitochondrial OS=Homo sapiens OX=9606 GN=HADHA PE=1 SV=2	0.0293477	0.000176578
		P07951	15	2	Tropomyosin beta chain OS=Homo sapiens OX=9606 GN=TPM2 PE=1 SV=1	0.154444	0.00393919
		P07437	14	2	Tubulin beta chain OS=Homo sapiens OX=9606 GN=TUBB PE=1 SV=2	0.657191	0.0117781
		Q13885	13	2	Tubulin beta-2A chain OS=Homo sapiens OX=9606 GN=TUBB2A PE=1 SV=1	0.1076	0.000626421
		Q13509	11	2	Tubulin beta-3 chain OS=Homo sapiens OX=9606 GN=TUBB3 PE=1 SV=2	0.127333	0.00457893
		Q6ZTW0	2	2	Tubulin polyglutamylase complex subunit 1 OS=Homo sapiens OX=9606 GN=TPGS1 PE=1 SV=2	0.0881346	0.0337119
		P54578	2	2	Ubiquitin carboxyl-terminal hydrolase 14 OS=Homo sapiens OX=9606 GN=USP14 PE=1 SV=3	0.0150247	0.000380607
		Q9UK80	2	2	Ubiquitin carboxyl-terminal hydrolase 21 OS=Homo sapiens OX=9606 GN=USP21 PE=1 SV=1	0.00771766	0.0050499
		Q96FW1	2	2	Ubiquitin thioesterase OTUB1 OS=Homo sapiens OX=9606 GN=OTUB1 PE=1 SV=2	0.0136589	0.0015096
		Q9ULV0	3	2	Unconventional myosin-Vb OS=Homo sapiens OX=9606 GN=MYO5B PE=1 SV=3	0.0096211	0.000281164
		Q13402	2	2	Unconventional myosin-VIIa OS=Homo sapiens OX=9606 GN=MYO7A PE=1 SV=2	0.0310637	0.00154721
		P38606	2	2	V-type proton ATPase catalytic subunit A OS=Homo sapiens OX=9606 GN=ATP6V1A PE=1 SV=2	0.0175757	0.0149914
		Q5THJ4	3	2	Vacuolar protein sorting-associated protein 13D OS=Homo sapiens OX=9606 GN=VPS13D PE=1 SV=2	0.0934555	0.00744781
		P67809	2	2	Y-box-binding protein 1 OS=Homo sapiens OX=9606 GN=YBX1 PE=1 SV=3	0.0158849	0.00133105
		Q15942	2	2	Zyxin OS=Homo sapiens OX=9606 GN=ZYX PE=1 SV=1	0.0158628	0.00456478
		Q16698	3	1	2_4-dienoyl-CoA reductase_ mitochondrial OS=Homo sapiens OX=9606 GN=DECR1 PE=1 SV=1	0.00642989	0.0012409
		O00487	1	1	26S proteasome non-ATPase regulatory subunit 14 OS=Homo sapiens OX=9606 GN=PSMD14 PE=1 SV=1	0.0259656	0.00108119
		P51665	2	1	26S proteasome non-ATPase regulatory subunit 7 OS=Homo sapiens OX=9606 GN=PSMD7 PE=1 SV=2	0.00683871	0.00104339
		P62333	1	1	26S proteasome regulatory subunit 10B OS=Homo sapiens OX=9606 GN=PSMC6 PE=1 SV=1	0.0119042	0.00116675
		P63220	1	1	40S ribosomal protein S21 OS=Homo sapiens OX=9606 GN=RPS21 PE=1 SV=1	0.0382987	0.00431802
		P62857	1	1	40S ribosomal protein S28 OS=Homo sapiens OX=9606 GN=RPS28 PE=1 SV=1	0.0214364	0.0298493
		P08195	2	1	4F2 cell-surface antigen heavy chain OS=Homo sapiens OX=9606 GN=SLC3A2 PE=1 SV=3	0.0113315	0.00101015
		O95336	1	1	6-phosphogluconolactonase OS=Homo sapiens OX=9606 GN=PGLS PE=1 SV=2	0.0123133	0.000195146
		P46779	2	1	60S ribosomal protein L28 OS=Homo sapiens OX=9606 GN=RPL28 PE=1 SV=3	0.0705038	0.00315239
		P47914	1	1	60S ribosomal protein L29 OS=Homo sapiens OX=9606 GN=RPL29 PE=1 SV=2	0.0252631	0.00136257
		P42766	1	1	60S ribosomal protein L35 OS=Homo sapiens OX=9606 GN=RPL35 PE=1 SV=2	0.0258223	0.00178583
		P83881	1	1	60S ribosomal protein L36a OS=Homo sapiens OX=9606 GN=RPL36A PE=1 SV=2	0.0318669	0.00106607
		Q9P1U1	3	1	Actin-related protein 3B OS=Homo sapiens OX=9606 GN=ACTR3B PE=2 SV=1	0.00304484	0.00120127
		P07741	1	1	Adenine phosphoribosyltransferase OS=Homo sapiens OX=9606 GN=APRT PE=1 SV=2	0.0100479	0.00178448
		P36405	1	1	ADP-ribosylation factor-like protein 3 OS=Homo sapiens OX=9606 GN=ARL3 PE=1 SV=2	0.0101441	0.000988281
		P05141	6	1	ADP/ATP translocase 2 OS=Homo sapiens OX=9606 GN=SLC25A5 PE=1 SV=7	0.0305062	0.00191535
		P12236	6	1	ADP/ATP translocase 3 OS=Homo sapiens OX=9606 GN=SLC25A6 PE=1 SV=4	0.0706179	0.00840311
		Q9H8T0	1	1	AKT-interacting protein OS=Homo sapiens OX=9606 GN=AKTIP PE=1 SV=1	0.0325791	0.00281518
		P04920	1	1	Anion exchange protein 2 OS=Homo sapiens OX=9606 GN=SLC4A2 PE=1 SV=4	0.2211	0.0143107
		Q8NFD2	1	1	Ankyrin repeat and protein kinase domain-containing protein 1 OS=Homo sapiens OX=9606 GN=ANKK1 PE=1 SV=1	1.21042	0.0476845
		P09525	2	1	Annexin A4 OS=Homo sapiens OX=9606 GN=ANXA4 PE=1 SV=4	0.0549802	0.0031172
		P20073	1	1	Annexin A7 OS=Homo sapiens OX=9606 GN=ANXA7 PE=1 SV=3	0.0260629	0.00352473
		O00148	6	1	ATP-dependent RNA helicase DDX39A OS=Homo sapiens OX=9606 GN=DDX39A PE=1 SV=2	0.0413079	0.00181238
		Q96L58	1	1	Beta-1_3-galactosyltransferase 6 OS=Homo sapiens OX=9606 GN=B3GALT6 PE=1 SV=2	0.0020967	0.0011035
		Q13425	2	1	Beta-2-syntrophin OS=Homo sapiens OX=9606 GN=SNTB2 PE=1 SV=1	0.0297522	0.00598387
		O95340	1	1	Bifunctional 3'-phosphoadenosine 5'-phosphosulfate synthase 2 OS=Homo sapiens OX=9606 GN=PAPSS2 PE=1 SV=2	0.00660917	0.00405626
		Q01064	2	1	Calcium/calmodulin-dependent 3'_5'-cyclic nucleotide phosphodiesterase 1B OS=Homo sapiens OX=9606 GN=PDE1B PE=1 SV=2	0.0599932	0.0125654
		P04632	1	1	Calpain small subunit 1 OS=Homo sapiens OX=9606 GN=CAPNS1 PE=1 SV=1	0.015922	0.000883339
		P10644	4	1	cAMP-dependent protein kinase type I-alpha regulatory subunit OS=Homo sapiens OX=9606 GN=PRKAR1A PE=1 SV=1	0.00292644	0.00107328
		P21964	1	1	Catechol O-methyltransferase OS=Homo sapiens OX=9606 GN=COMT PE=1 SV=2	0.00269875	0.00249803
		Q9UBR2	2	1	Cathepsin Z OS=Homo sapiens OX=9606 GN=CTSZ PE=1 SV=1	0.0131516	0.00245176
		Q6NZI2	1	1	Caveolae-associated protein 1 OS=Homo sapiens OX=9606 GN=CAVIN1 PE=1 SV=1	0.134586	0.00600011
		P13987	1	1	CD59 glycoprotein OS=Homo sapiens OX=9606 GN=CD59 PE=1 SV=1	0.0699052	0.00253482
		Q99627	1	1	COP9 signalosome complex subunit 8 OS=Homo sapiens OX=9606 GN=COPS8 PE=1 SV=1	0.014254	0.000295755
		Q99829	1	1	Copine-1 OS=Homo sapiens OX=9606 GN=CPNE1 PE=1 SV=1	0.0126933	0.00289855
		Q00537	1	1	Cyclin-dependent kinase 17 OS=Homo sapiens OX=9606 GN=CDK17 PE=1 SV=2	0.0467499	0.00448284
		P50750	3	1	Cyclin-dependent kinase 9 OS=Homo sapiens OX=9606 GN=CDK9 PE=1 SV=3	0.0178604	0.000823745
		P21291	2	1	Cysteine and glycine-rich protein 1 OS=Homo sapiens OX=9606 GN=CSRP1 PE=1 SV=3	0.0856951	0.0149359
		P00403	1	1	Cytochrome c oxidase subunit 2 OS=Homo sapiens OX=9606 GN=MT-CO2 PE=1 SV=1	0.0438748	0.00322751
		O43237	1	1	Cytoplasmic dynein 1 light intermediate chain 2 OS=Homo sapiens OX=9606 GN=DYNC1LI2 PE=1 SV=1	0.00465988	0.00135339
		P28838	1	1	Cytosol aminopeptidase OS=Homo sapiens OX=9606 GN=LAP3 PE=1 SV=3	0.00733635	0.00100637
		Q14194	4	1	Dihydropyrimidinase-related protein 1 OS=Homo sapiens OX=9606 GN=CRMP1 PE=1 SV=1	0.0150037	0.000338968
		P25205	1	1	DNA replication licensing factor MCM3 OS=Homo sapiens OX=9606 GN=MCM3 PE=1 SV=3	0.00681571	0.00271994
		P33991	2	1	DNA replication licensing factor MCM4 OS=Homo sapiens OX=9606 GN=MCM4 PE=1 SV=5	0.0392737	0.00766942
		P11388	3	1	DNA topoisomerase 2-alpha OS=Homo sapiens OX=9606 GN=TOP2A PE=1 SV=3	0.57328	0.0914192
		P0CJ87	1	1	Double homeobox protein 4-like protein 4 OS=Homo sapiens OX=9606 GN=DUX4L4 PE=3 SV=1	0.022213	0.00211963
		Q9UNH5	1	1	Dual specificity protein phosphatase CDC14A OS=Homo sapiens OX=9606 GN=CDC14A PE=1 SV=1	0.0556473	0.00464417
		P62495	1	1	Eukaryotic peptide chain release factor subunit 1 OS=Homo sapiens OX=9606 GN=ETF1 PE=1 SV=3	0.0165529	0.00175015
		Q15056	1	1	Eukaryotic translation initiation factor 4H OS=Homo sapiens OX=9606 GN=EIF4H PE=1 SV=5	0.0360614	0.00498451
		Q96A65	4	1	Exocyst complex component 4 OS=Homo sapiens OX=9606 GN=EXOC4 PE=1 SV=1	0.000843192	0.000849539
		P78417	1	1	Glutathione S-transferase omega-1 OS=Homo sapiens OX=9606 GN=GSTO1 PE=1 SV=2	0.0289604	0.000686237
		P11216	3	1	Glycogen phosphorylase_ brain form OS=Homo sapiens OX=9606 GN=PYGB PE=1 SV=5	0.0238607	0.00435481
		P49841	1	1	Glycogen synthase kinase-3 beta OS=Homo sapiens OX=9606 GN=GSK3B PE=1 SV=2	0.0375018	0.00529458
		O95661	2	1	GTP-binding protein Di-Ras3 OS=Homo sapiens OX=9606 GN=DIRAS3 PE=1 SV=1	0.0667575	0.00374268
		P62879	3	1	Guanine nucleotide-binding protein G(I)/G(S)/G(T) subunit beta-2 OS=Homo sapiens OX=9606 GN=GNB2 PE=1 SV=3	0.0333156	0.00173491
		P09471	2	1	Guanine nucleotide-binding protein G(o) subunit alpha OS=Homo sapiens OX=9606 GN=GNAO1 PE=1 SV=4	0.105781	0.00207973
		Q9Y6N9	1	1	Harmonin OS=Homo sapiens OX=9606 GN=USH1C PE=1 SV=3	0.071017	0.00236575
		P34931	9	1	Heat shock 70 kDa protein 1-like OS=Homo sapiens OX=9606 GN=HSPA1L PE=1 SV=2	0.0132148	0.00169461
		Q12931	3	1	Heat shock protein 75 kDa_ mitochondrial OS=Homo sapiens OX=9606 GN=TRAP1 PE=1 SV=3	0.0952921	0.00300475
		Q9NRV9	1	1	Heme-binding protein 1 OS=Homo sapiens OX=9606 GN=HEBP1 PE=1 SV=1	0.00576114	0.000473538
		B2RXH8	2	1	Heterogeneous nuclear ribonucleoprotein C-like 2 OS=Homo sapiens OX=9606 GN=HNRNPCL2 PE=1 SV=1	0.0158641	0.000260654
		Q14103	3	1	Heterogeneous nuclear ribonucleoprotein D0 OS=Homo sapiens OX=9606 GN=HNRNPD PE=1 SV=1	0.198386	0.0656889
		P17096	1	1	High mobility group protein HMG-I/HMG-Y OS=Homo sapiens OX=9606 GN=HMGA1 PE=1 SV=3	0.102549	0.00339101
		P49590	3	1	Histidine--tRNA ligase_ mitochondrial OS=Homo sapiens OX=9606 GN=HARS2 PE=1 SV=1	0.0203875	0.00110656
		P0C0S5	3	1	Histone H2A.Z OS=Homo sapiens OX=9606 GN=H2AZ1 PE=1 SV=2	0.0563404	0.00739171
		P16104	3	1	Histone H2AX OS=Homo sapiens OX=9606 GN=H2AX PE=1 SV=2	0.0864479	0.00851623
		P06899	5	1	Histone H2B type 1-J OS=Homo sapiens OX=9606 GN=H2BC11 PE=1 SV=3	0.576241	0.00430549
		P04439	3	1	HLA class I histocompatibility antigen_ A alpha chain OS=Homo sapiens OX=9606 GN=HLA-A PE=1 SV=2	0.0731057	0.009536
		P13747	3	1	HLA class I histocompatibility antigen_ alpha chain E OS=Homo sapiens OX=9606 GN=HLA-E PE=1 SV=4	0.0140864	0.0015727
		P01889	3	1	HLA class I histocompatibility antigen_ B alpha chain OS=Homo sapiens OX=9606 GN=HLA-B PE=1 SV=3	0.0321074	0.00317984
		A6NHT5	1	1	Homeobox protein HMX3 OS=Homo sapiens OX=9606 GN=HMX3 PE=1 SV=1	0.0161954	0.00030553
		P0DOX6	1	1	Immunoglobulin mu heavy chain OS=Homo sapiens OX=9606 PE=1 SV=2	0.0139686	0.00114089
		P52292	1	1	Importin subunit alpha-1 OS=Homo sapiens OX=9606 GN=KPNA2 PE=1 SV=1	0.0101146	0.000819218
		P12268	1	1	Inosine-5'-monophosphate dehydrogenase 2 OS=Homo sapiens OX=9606 GN=IMPDH2 PE=1 SV=2	0.0429591	0.00227765
		Q14643	4	1	Inositol 1_4_5-trisphosphate receptor type 1 OS=Homo sapiens OX=9606 GN=ITPR1 PE=1 SV=3	0.241856	0.00723221
		Q14571	4	1	Inositol 1_4_5-trisphosphate receptor type 2 OS=Homo sapiens OX=9606 GN=ITPR2 PE=1 SV=2	0.798806	0.0238867
		Q86VH2	3	1	Kinesin-like protein KIF27 OS=Homo sapiens OX=9606 GN=KIF27 PE=1 SV=1	0.0270106	0.00363618
		Q6ZMR3	3	1	L-lactate dehydrogenase A-like 6A OS=Homo sapiens OX=9606 GN=LDHAL6A PE=2 SV=1	0.00638555	0.00236471
		P09960	2	1	Leukotriene A-4 hydrolase OS=Homo sapiens OX=9606 GN=LTA4H PE=1 SV=2	0.00714175	0.00248146
		P11279	4	1	Lysosome-associated membrane glycoprotein 1 OS=Homo sapiens OX=9606 GN=LAMP1 PE=1 SV=3	0.237063	0.0127549
		P13473	3	1	Lysosome-associated membrane glycoprotein 2 OS=Homo sapiens OX=9606 GN=LAMP2 PE=1 SV=2	0.0231977	0.00238916
		Q96PC5	2	1	Melanoma inhibitory activity protein 2 OS=Homo sapiens OX=9606 GN=MIA2 PE=1 SV=4	0.0855441	0.0036928
		Q9H492	1	1	Microtubule-associated proteins 1A/1B light chain 3A OS=Homo sapiens OX=9606 GN=MAP1LC3A PE=1 SV=2	0.0314797	0.00310018
		O43684	1	1	Mitotic checkpoint protein BUB3 OS=Homo sapiens OX=9606 GN=BUB3 PE=1 SV=1	0.00258448	0.000861468
		Q9UKD2	1	1	mRNA turnover protein 4 homolog OS=Homo sapiens OX=9606 GN=MRTO4 PE=1 SV=2	0.193619	0.0199043
		P22234	1	1	Multifunctional protein ADE2 OS=Homo sapiens OX=9606 GN=PAICS PE=1 SV=3	0.0110111	0.00217118
		Q15746	3	1	Myosin light chain kinase_ smooth muscle OS=Homo sapiens OX=9606 GN=MYLK PE=1 SV=4	0.0341394	0.00487381
		Q8NFP9	2	1	Neurobeachin OS=Homo sapiens OX=9606 GN=NBEA PE=1 SV=3	0.0301227	0.009927
		P07197	3	1	Neurofilament medium polypeptide OS=Homo sapiens OX=9606 GN=NEFM PE=1 SV=3	0.0336665	0.00820724
		Q9H1E3	1	1	Nuclear ubiquitous casein and cyclin-dependent kinase substrate 1 OS=Homo sapiens OX=9606 GN=NUCKS1 PE=1 SV=1	0.0173349	0.0014977
		P55209	2	1	Nucleosome assembly protein 1-like 1 OS=Homo sapiens OX=9606 GN=NAP1L1 PE=1 SV=1	0.0530742	0.00706298
		Q99733	2	1	Nucleosome assembly protein 1-like 4 OS=Homo sapiens OX=9606 GN=NAP1L4 PE=1 SV=1	0.0264215	0.00395705
		Q9NTK5	1	1	Obg-like ATPase 1 OS=Homo sapiens OX=9606 GN=OLA1 PE=1 SV=2	0.035553	0.00156995
		O95571	1	1	Persulfide dioxygenase ETHE1_ mitochondrial OS=Homo sapiens OX=9606 GN=ETHE1 PE=1 SV=2	0.0178388	0.000280256
		P07205	3	1	Phosphoglycerate kinase 2 OS=Homo sapiens OX=9606 GN=PGK2 PE=1 SV=3	0.0146238	0.000510948
		P68402	1	1	Platelet-activating factor acetylhydrolase IB subunit beta OS=Homo sapiens OX=9606 GN=PAFAH1B2 PE=1 SV=1	0.0409087	0.00143784
		Q9UIW2	2	1	Plexin-A1 OS=Homo sapiens OX=9606 GN=PLXNA1 PE=1 SV=3	0.00667302	0.00839478
		P51805	2	1	Plexin-A3 OS=Homo sapiens OX=9606 GN=PLXNA3 PE=1 SV=2	0.00687131	0.00073501
		Q15366	4	1	Poly(rC)-binding protein 2 OS=Homo sapiens OX=9606 GN=PCBP2 PE=1 SV=1	0.0353041	0.0015116
		Q5JQF8	2	1	Polyadenylate-binding protein 1-like 2 OS=Homo sapiens OX=9606 GN=PABPC1L2A PE=2 SV=1	0.085304	0.00300521
		Q96DU9	3	1	Polyadenylate-binding protein 5 OS=Homo sapiens OX=9606 GN=PABPC5 PE=1 SV=1	0.700286	0.0240739
		A5A3E0	7	1	POTE ankyrin domain family member F OS=Homo sapiens OX=9606 GN=POTEF PE=1 SV=2	0.0176416	0.005096
		Q9BYU1	1	1	Pre-B-cell leukemia transcription factor 4 OS=Homo sapiens OX=9606 GN=PBX4 PE=1 SV=2	0.00154629	0.000605905
		P26196	1	1	Probable ATP-dependent RNA helicase DDX6 OS=Homo sapiens OX=9606 GN=DDX6 PE=1 SV=2	0.0115748	0.00198647
		Q6MZQ0	1	1	Proline-rich protein 5-like OS=Homo sapiens OX=9606 GN=PRR5L PE=1 SV=2	0.0815338	0.00290263
		Q15185	1	1	Prostaglandin E synthase 3 OS=Homo sapiens OX=9606 GN=PTGES3 PE=1 SV=1	0.0765797	0.00311801
		Q06323	1	1	Proteasome activator complex subunit 1 OS=Homo sapiens OX=9606 GN=PSME1 PE=1 SV=1	0.0202371	0.00143068
		P49721	1	1	Proteasome subunit beta type-2 OS=Homo sapiens OX=9606 GN=PSMB2 PE=1 SV=1	0.0101679	0.0019649
		P28070	1	1	Proteasome subunit beta type-4 OS=Homo sapiens OX=9606 GN=PSMB4 PE=1 SV=4	0.131503	0.0172218
		O60888	1	1	Protein CutA OS=Homo sapiens OX=9606 GN=CUTA PE=1 SV=2	0.0385568	0.00213496
		Q9P2K9	2	1	Protein dispatched homolog 3 OS=Homo sapiens OX=9606 GN=DISP3 PE=2 SV=2	0.175233	0.00779095
		Q9BSJ6	1	1	Protein PIMREG OS=Homo sapiens OX=9606 GN=PIMREG PE=1 SV=1	0.108174	0.00531292
		Q86X45	1	1	Protein tilB homolog OS=Homo sapiens OX=9606 GN=LRRC6 PE=1 SV=3	0.045637	0.00539386
		Q04941	1	1	Proteolipid protein 2 OS=Homo sapiens OX=9606 GN=PLP2 PE=1 SV=1	0.040773	0.00181097
		Q9Y5E1	1	1	Protocadherin beta-9 OS=Homo sapiens OX=9606 GN=PCDHB9 PE=2 SV=2	0.190158	0.00188552
		A6NKH3	1	1	Putative 60S ribosomal protein L37a-like protein OS=Homo sapiens OX=9606 GN=RPL37AP8 PE=5 SV=2	0.00883376	0.0039807
		Q58FF8	9	1	Putative heat shock protein HSP 90-beta 2 OS=Homo sapiens OX=9606 GN=HSP90AB2P PE=1 SV=2	0.00269303	0.000164473
		Q7Z2F6	2	1	Putative protein ZNF720 OS=Homo sapiens OX=9606 GN=ZNF720 PE=1 SV=1	0.0380659	0.000879003
		P0C7V7	1	1	Putative signal peptidase complex catalytic subunit SEC11B OS=Homo sapiens OX=9606 GN=SEC11B PE=5 SV=1	0.0905077	0.0117021
		Q5SR53	1	1	Putative uncharacterized protein PIK3CD-AS1 OS=Homo sapiens OX=9606 GN=PIK3CD-AS1 PE=5 SV=1	0.00496713	0.00168239
		Q96C36	2	1	Pyrroline-5-carboxylate reductase 2 OS=Homo sapiens OX=9606 GN=PYCR2 PE=1 SV=1	0.00749471	0.00173972
		P30613	3	1	Pyruvate kinase PKLR OS=Homo sapiens OX=9606 GN=PKLR PE=1 SV=2	0.155495	0.00692462
		P35241	7	1	Radixin OS=Homo sapiens OX=9606 GN=RDX PE=1 SV=1	0.043964	0.00665523
		Q5VZM2	1	1	Ras-related GTP-binding protein B OS=Homo sapiens OX=9606 GN=RRAGB PE=1 SV=1	0.0269142	0.000280581
		P10301	1	1	Ras-related protein R-Ras OS=Homo sapiens OX=9606 GN=RRAS PE=1 SV=1	0.0246106	0.00283195
		Q9UL25	1	1	Ras-related protein Rab-21 OS=Homo sapiens OX=9606 GN=RAB21 PE=1 SV=3	0.0152625	0.00270472
		Q86YS6	3	1	Ras-related protein Rab-43 OS=Homo sapiens OX=9606 GN=RAB43 PE=1 SV=1	0.0845433	0.0156187
		Q8NFJ5	1	1	Retinoic acid-induced protein 3 OS=Homo sapiens OX=9606 GN=GPRC5A PE=1 SV=2	0.00592843	0.00143024
		Q07960	4	1	Rho GTPase-activating protein 1 OS=Homo sapiens OX=9606 GN=ARHGAP1 PE=1 SV=1	0.0385307	0.00580116
		P08134	6	1	Rho-related GTP-binding protein RhoC OS=Homo sapiens OX=9606 GN=RHOC PE=1 SV=1	0.123766	0.0186436
		P84095	2	1	Rho-related GTP-binding protein RhoG OS=Homo sapiens OX=9606 GN=RHOG PE=1 SV=1	0.00325207	0.000578287
		Q8TEB9	1	1	Rhomboid-related protein 4 OS=Homo sapiens OX=9606 GN=RHBDD1 PE=1 SV=1	0.126477	0.0050606
		P11908	2	1	Ribose-phosphate pyrophosphokinase 2 OS=Homo sapiens OX=9606 GN=PRPS2 PE=1 SV=2	0.120759	0.0184248
		P21108	2	1	Ribose-phosphate pyrophosphokinase 3 OS=Homo sapiens OX=9606 GN=PRPS1L1 PE=1 SV=2	0.0325636	0.00279044
		Q9H6W3	1	1	Ribosomal oxygenase 1 OS=Homo sapiens OX=9606 GN=RIOX1 PE=1 SV=2	0.515601	0.0325902
		Q8N7X1	2	1	RNA-binding motif protein_ X-linked-like-3 OS=Homo sapiens OX=9606 GN=RBMXL3 PE=2 SV=2	0.00398407	0.00276888
		Q01844	1	1	RNA-binding protein EWS OS=Homo sapiens OX=9606 GN=EWSR1 PE=1 SV=1	0.0264602	0.0010305
		Q9NZJ4	4	1	Sacsin OS=Homo sapiens OX=9606 GN=SACS PE=1 SV=2	0.00177418	0.0012038
		Q9NVA2	2	1	Septin-11 OS=Homo sapiens OX=9606 GN=SEPTIN11 PE=1 SV=3	0.00373802	0.00110324
		Q16181	2	1	Septin-7 OS=Homo sapiens OX=9606 GN=SEPTIN7 PE=1 SV=2	0.0603599	0.002912
		Q9GZT4	1	1	Serine racemase OS=Homo sapiens OX=9606 GN=SRR PE=1 SV=1	0.00423206	0.00649622
		Q01130	1	1	Serine/arginine-rich splicing factor 2 OS=Homo sapiens OX=9606 GN=SRSF2 PE=1 SV=4	0.0593769	0.00935065
		P84103	2	1	Serine/arginine-rich splicing factor 3 OS=Homo sapiens OX=9606 GN=SRSF3 PE=1 SV=1	0.00756034	0.00228618
		P30154	6	1	Serine/threonine-protein phosphatase 2A 65 kDa regulatory subunit A beta isoform OS=Homo sapiens OX=9606 GN=PPP2R1B PE=1 SV=3	0.0226604	0.00135351
		O75368	1	1	SH3 domain-binding glutamic acid-rich-like protein OS=Homo sapiens OX=9606 GN=SH3BGRL PE=1 SV=1	0.0199078	0.000733397
		P67812	1	1	Signal peptidase complex catalytic subunit SEC11A OS=Homo sapiens OX=9606 GN=SEC11A PE=1 SV=1	0.0382973	0.00585251
		Q04837	2	1	Single-stranded DNA-binding protein_ mitochondrial OS=Homo sapiens OX=9606 GN=SSBP1 PE=1 SV=1	0.0520637	0.00164228
		P14678	1	1	Small nuclear ribonucleoprotein-associated proteins B and B' OS=Homo sapiens OX=9606 GN=SNRPB PE=1 SV=2	0.0340505	0.00887769
		P13637	4	1	Sodium/potassium-transporting ATPase subunit alpha-3 OS=Homo sapiens OX=9606 GN=ATP1A3 PE=1 SV=3	0.0380991	0.00138118
		P30626	1	1	Sorcin OS=Homo sapiens OX=9606 GN=SRI PE=1 SV=1	0.0116186	0.00898721
		P19623	1	1	Spermidine synthase OS=Homo sapiens OX=9606 GN=SRM PE=1 SV=1	0.0326574	0.00140506
		P52788	1	1	Spermine synthase OS=Homo sapiens OX=9606 GN=SMS PE=1 SV=2	0.0359594	0.0107554
		Q9NXE4	1	1	Sphingomyelin phosphodiesterase 4 OS=Homo sapiens OX=9606 GN=SMPD4 PE=1 SV=3	0.0541006	0.0335628
		O75533	2	1	Splicing factor 3B subunit 1 OS=Homo sapiens OX=9606 GN=SF3B1 PE=1 SV=3	0.00524122	0.00167093
		P23246	1	1	Splicing factor_ proline- and glutamine-rich OS=Homo sapiens OX=9606 GN=SFPQ PE=1 SV=2	0.0120556	0.000856907
		Q9UJZ1	1	1	Stomatin-like protein 2_ mitochondrial OS=Homo sapiens OX=9606 GN=STOML2 PE=1 SV=1	0.00329837	0.00247233
		Q15772	2	1	Striated muscle preferentially expressed protein kinase OS=Homo sapiens OX=9606 GN=SPEG PE=1 SV=4	0.0194408	0.000687807
		Q92526	1	1	T-complex protein 1 subunit zeta-2 OS=Homo sapiens OX=9606 GN=CCT6B PE=1 SV=5	0.0690041	0.00124412
		Q13148	2	1	TAR DNA-binding protein 43 OS=Homo sapiens OX=9606 GN=TARDBP PE=1 SV=1	0.0204463	0.00280863
		O43156	1	1	TELO2-interacting protein 1 homolog OS=Homo sapiens OX=9606 GN=TTI1 PE=1 SV=3	0.0074446	0.00250363
		Q8NDW8	1	1	Tetratricopeptide repeat protein 21A OS=Homo sapiens OX=9606 GN=TTC21A PE=1 SV=3	0.0402146	0.0042611
		Q9BRA2	1	1	Thioredoxin domain-containing protein 17 OS=Homo sapiens OX=9606 GN=TXNDC17 PE=1 SV=1	0.014877	0.000347411
		O43396	1	1	Thioredoxin-like protein 1 OS=Homo sapiens OX=9606 GN=TXNL1 PE=1 SV=3	0.0109246	0.00286201
		Q9H3N1	1	1	Thioredoxin-related transmembrane protein 1 OS=Homo sapiens OX=9606 GN=TMX1 PE=1 SV=1	0.0106792	0.00141959
		Q9BUZ4	2	1	TNF receptor-associated factor 4 OS=Homo sapiens OX=9606 GN=TRAF4 PE=1 SV=1	0.0159124	0.00216523
		P0DI81	1	1	Trafficking protein particle complex subunit 2 OS=Homo sapiens OX=9606 GN=TRAPPC2 PE=1 SV=1	0.0226858	0.00269945
		P02786	1	1	Transferrin receptor protein 1 OS=Homo sapiens OX=9606 GN=TFRC PE=1 SV=2	0.0103131	0.000961048
		P61586	6	1	Transforming protein RhoA OS=Homo sapiens OX=9606 GN=RHOA PE=1 SV=1	0.00935425	0.000662179
		P49755	2	1	Transmembrane emp24 domain-containing protein 10 OS=Homo sapiens OX=9606 GN=TMED10 PE=1 SV=2	0.0569817	0.00999253
		P23381	2	1	Tryptophan--tRNA ligase_ cytoplasmic OS=Homo sapiens OX=9606 GN=WARS1 PE=1 SV=2	0.0297266	0.00275571
		Q71U36	13	1	Tubulin alpha-1A chain OS=Homo sapiens OX=9606 GN=TUBA1A PE=1 SV=1	0.415472	0.00800401
		P68363	13	1	Tubulin alpha-1B chain OS=Homo sapiens OX=9606 GN=TUBA1B PE=1 SV=1	0.732386	0.0142061
		Q9H4B7	4	1	Tubulin beta-1 chain OS=Homo sapiens OX=9606 GN=TUBB1 PE=1 SV=1	0.0112154	0.000705435
		P04350	13	1	Tubulin beta-4A chain OS=Homo sapiens OX=9606 GN=TUBB4A PE=1 SV=2	0.0237301	0.000425286
		P68371	14	1	Tubulin beta-4B chain OS=Homo sapiens OX=9606 GN=TUBB4B PE=1 SV=1	0.119793	0.00214691
		Q6IBS0	2	1	Twinfilin-2 OS=Homo sapiens OX=9606 GN=TWF2 PE=1 SV=2	0.00314481	0.00272905
		P61088	1	1	Ubiquitin-conjugating enzyme E2 N OS=Homo sapiens OX=9606 GN=UBE2N PE=1 SV=1	0.0629043	0.00128966
		Q13404	2	1	Ubiquitin-conjugating enzyme E2 variant 1 OS=Homo sapiens OX=9606 GN=UBE2V1 PE=1 SV=2	0.0488428	0.00471128
		Q9NYU2	1	1	UDP-glucose:glycoprotein glucosyltransferase 1 OS=Homo sapiens OX=9606 GN=UGGT1 PE=1 SV=3	0.0173774	0.00677889
		Q16222	1	1	UDP-N-acetylhexosamine pyrophosphorylase OS=Homo sapiens OX=9606 GN=UAP1 PE=1 SV=3	0.00988878	0.00117486
		P30085	1	1	UMP-CMP kinase OS=Homo sapiens OX=9606 GN=CMPK1 PE=1 SV=3	0.056823	0.00227969
		Q86VN1	1	1	Vacuolar protein-sorting-associated protein 36 OS=Homo sapiens OX=9606 GN=VPS36 PE=1 SV=1	0.0511796	0.00117697
		Q12981	2	1	Vesicle transport protein SEC20 OS=Homo sapiens OX=9606 GN=BNIP1 PE=1 SV=3	0.00866961	0.00737555
		A4UGR9	2	1	Xin actin-binding repeat-containing protein 2 OS=Homo sapiens OX=9606 GN=XIRP2 PE=1 SV=2	0.214572	0.0290323
		Q9UHR6	1	1	Zinc finger HIT domain-containing protein 2 OS=Homo sapiens OX=9606 GN=ZNHIT2 PE=1 SV=1	0.885984	0.0278627

## Sheet: Negative Control
						Negative Control
		Accession	Peptide count	Unique peptides	Description	Mean - percentage of all identified proteins (in %, n=3)	Standard Deviation
		P35579	30	29	Myosin-9 OS=Homo sapiens OX=9606 GN=MYH9 PE=1 SV=4	1.34946	0.078926
		P25705	9	9	ATP synthase subunit alpha_ mitochondrial OS=Homo sapiens OX=9606 GN=ATP5F1A PE=1 SV=1	0.480599	0.0237631
		P02545	8	8	Prelamin-A/C OS=Homo sapiens OX=9606 GN=LMNA PE=1 SV=1	0.328025	0.0161712
		P62805	6	6	Histone H4 OS=Homo sapiens OX=9606 GN=H4C1 PE=1 SV=2	14.0168	0.181523
		O60814	5	5	Histone H2B type 1-K OS=Homo sapiens OX=9606 GN=H2BC12 PE=1 SV=3	10.0989	0.110122
		P68431	5	5	Histone H3.1 OS=Homo sapiens OX=9606 GN=H3C1 PE=1 SV=2	5.86521	0.0306543
		P60709	15	4	Actin_ cytoplasmic 1 OS=Homo sapiens OX=9606 GN=ACTB PE=1 SV=1	6.93959	0.164771
		P62736	12	3	Actin_ aortic smooth muscle OS=Homo sapiens OX=9606 GN=ACTA2 PE=1 SV=1	4.5368	0.17936
		P06576	3	3	ATP synthase subunit beta_ mitochondrial OS=Homo sapiens OX=9606 GN=ATP5F1B PE=1 SV=3	0.285981	0.0199252
		O14950	3	3	Myosin regulatory light chain 12B OS=Homo sapiens OX=9606 GN=MYL12B PE=1 SV=2	0.216736	0.0369829
		P35232	3	3	Prohibitin OS=Homo sapiens OX=9606 GN=PHB PE=1 SV=1	0.173812	0.00473332
		P08670	3	3	Vimentin OS=Homo sapiens OX=9606 GN=VIM PE=1 SV=4	0.299321	0.0229347
		P05141	4	2	ADP/ATP translocase 2 OS=Homo sapiens OX=9606 GN=SLC25A5 PE=1 SV=7	0.357318	0.0157746
		P12236	4	2	ADP/ATP translocase 3 OS=Homo sapiens OX=9606 GN=SLC25A6 PE=1 SV=4	0.413839	0.0252733
		Q07065	2	2	Cytoskeleton-associated protein 4 OS=Homo sapiens OX=9606 GN=CKAP4 PE=1 SV=2	0.158083	0.0235162
		P16401	2	2	Histone H1.5 OS=Homo sapiens OX=9606 GN=H1-5 PE=1 SV=3	0.916336	0.0677037
		P60660	2	2	Myosin light polypeptide 6 OS=Homo sapiens OX=9606 GN=MYL6 PE=1 SV=2	0.310702	0.0245992
		P0CG47	2	2	Polyubiquitin-B OS=Homo sapiens OX=9606 GN=UBB PE=1 SV=1	1.75913	0.164864
		Q5T200	2	2	Zinc finger CCCH domain-containing protein 13 OS=Homo sapiens OX=9606 GN=ZC3H13 PE=1 SV=1	1.34542	0.0587493
		P00403	1	1	Cytochrome c oxidase subunit 2 OS=Homo sapiens OX=9606 GN=MT-CO2 PE=1 SV=1	0.299947	0.0438232
		P10412	1	1	Histone H1.4 OS=Homo sapiens OX=9606 GN=H1-4 PE=1 SV=2	1.55141	0.157695
		P04908	3	1	Histone H2A type 1-B/E OS=Homo sapiens OX=9606 GN=H2AC4 PE=1 SV=2	13.4281	0.336641
		P0C0S5	3	1	Histone H2A.Z OS=Homo sapiens OX=9606 GN=H2AZ1 PE=1 SV=2	0.413543	0.00680912
		Q00325	1	1	Phosphate carrier protein_ mitochondrial OS=Homo sapiens OX=9606 GN=SLC25A3 PE=1 SV=2	0.612544	0.084674
		Q96DU9	1	1	Polyadenylate-binding protein 5 OS=Homo sapiens OX=9606 GN=PABPC5 PE=1 SV=1	1.44918	0.0713187
		Q6UXU0	1	1	Putative uncharacterized protein UNQ9165/PRO28630 OS=Homo sapiens OX=9606 GN=UNQ9165/PRO28630 PE=2 SV=1	0.256721	0.444653
		P06753	1	1	Tropomyosin alpha-3 chain OS=Homo sapiens OX=9606 GN=TPM3 PE=1 SV=2	0.569682	0.0215025
		Q8NEP4	1	1	Uncharacterized protein C17orf47 OS=Homo sapiens OX=9606 GN=C17orf47 PE=1 SV=3	23.965	0.297269
		O95399	1	1	Urotensin-2 OS=Homo sapiens OX=9606 GN=UTS2 PE=1 SV=1	0.0647298	0.007624
		Q9UHR6	1	1	Zinc finger HIT domain-containing protein 2 OS=Homo sapiens OX=9606 GN=ZNHIT2 PE=1 SV=1	7.53708	0.153345
